# Supplementary material for: Association between spinal curvature disorders and injury: a nationwide population-based retrospective cohort study
Source: PubMed Central journal article supplement — BMJ Open. 2019 Jan 17;9(1):e023604. doi: 10.1136/bmjopen-2018-023604 (PMC6340633; doi:10.1136/bmjopen-2018-023604), 2019-01-17
Supplement: bmjopen-2018-023604.draft_revisions.pdf [file bmjopen-2018-023604.draft_revisions.pdf]

# BMJ Open

BMJ Open is committed to open peer review. As part of this commitment we make the peer review history of every article we publish publicly available.

When an article is published we post the peer reviewers' comments and the authors' responses online. We also post the versions of the paper that were used during peer review. These are the versions that the peer review comments apply to.

The versions of the paper that follow are the versions that were submitted during the peer review process. They are not the versions of record or the final published versions. They should not be cited or distributed as the published version of this manuscript.

BMJ Open is an open access journal and the full, final, typeset and author-corrected version of record of the manuscript is available on our site with no access controls, subscription charges or pay-per-view fees (<http://bmjopen.bmj.com>).

If you have any questions on BMJ Open's open peer review process please email [info.bmjopen@bmj.com](mailto:info.bmjopen@bmj.com)

# BMJ Open

## Association between Spinal Curvatures and Injury: A Nationwide Population-based Retrospective Cohort Study

|                               |                                                                                                                                                                                                                                                                                                                                                                                                                                                                                                                                                                                                                                                                                                                                                                                                                                                                                                                                                                                                                                                                                                                                                                                                                                                                                                                                                                                                                                                                                                                                                                                                                                                                                                                                                                                                                                                                                                                                                                                                                                                                                                                                                                                                                                                                                                                                                                                                                                                          |
|-------------------------------|----------------------------------------------------------------------------------------------------------------------------------------------------------------------------------------------------------------------------------------------------------------------------------------------------------------------------------------------------------------------------------------------------------------------------------------------------------------------------------------------------------------------------------------------------------------------------------------------------------------------------------------------------------------------------------------------------------------------------------------------------------------------------------------------------------------------------------------------------------------------------------------------------------------------------------------------------------------------------------------------------------------------------------------------------------------------------------------------------------------------------------------------------------------------------------------------------------------------------------------------------------------------------------------------------------------------------------------------------------------------------------------------------------------------------------------------------------------------------------------------------------------------------------------------------------------------------------------------------------------------------------------------------------------------------------------------------------------------------------------------------------------------------------------------------------------------------------------------------------------------------------------------------------------------------------------------------------------------------------------------------------------------------------------------------------------------------------------------------------------------------------------------------------------------------------------------------------------------------------------------------------------------------------------------------------------------------------------------------------------------------------------------------------------------------------------------------------|
| Journal:                      | <i>BMJ Open</i>                                                                                                                                                                                                                                                                                                                                                                                                                                                                                                                                                                                                                                                                                                                                                                                                                                                                                                                                                                                                                                                                                                                                                                                                                                                                                                                                                                                                                                                                                                                                                                                                                                                                                                                                                                                                                                                                                                                                                                                                                                                                                                                                                                                                                                                                                                                                                                                                                                          |
| Manuscript ID                 | bmjopen-2018-023604                                                                                                                                                                                                                                                                                                                                                                                                                                                                                                                                                                                                                                                                                                                                                                                                                                                                                                                                                                                                                                                                                                                                                                                                                                                                                                                                                                                                                                                                                                                                                                                                                                                                                                                                                                                                                                                                                                                                                                                                                                                                                                                                                                                                                                                                                                                                                                                                                                      |
| Article Type:                 | Research                                                                                                                                                                                                                                                                                                                                                                                                                                                                                                                                                                                                                                                                                                                                                                                                                                                                                                                                                                                                                                                                                                                                                                                                                                                                                                                                                                                                                                                                                                                                                                                                                                                                                                                                                                                                                                                                                                                                                                                                                                                                                                                                                                                                                                                                                                                                                                                                                                                 |
| Date Submitted by the Author: | 14-Apr-2018                                                                                                                                                                                                                                                                                                                                                                                                                                                                                                                                                                                                                                                                                                                                                                                                                                                                                                                                                                                                                                                                                                                                                                                                                                                                                                                                                                                                                                                                                                                                                                                                                                                                                                                                                                                                                                                                                                                                                                                                                                                                                                                                                                                                                                                                                                                                                                                                                                              |
| Complete List of Authors:     | <p>Kuo, Yen-Liang; Division of Chest Medicine, Department of Internal Medicine, Fu Jen Catholic University Hospital, New Taipei City, Taiwan, Division of Chest Medicine, Department of Internal Medicine, Fu Jen Catholic University Hospital, New Taipei City, Taiwan</p> <p>Chung, Chi-Hsiang; School of Public Health, National Defense Medical Center, Taipei, Taiwan, School of Public Health, National Defense Medical Center, Taipei, Taiwan</p> <p>Huang, Tsai-Wang; Division of Thoracic Surgery, Department of Surgery, Tri-Service General Hospital, National Defense Medical Center, Taipei, Taiwan, Division of Thoracic Surgery, Department of Surgery, Tri-Service General Hospital, National Defense Medical Center, Taipei, Taiwan</p> <p>Tsao, Chang-Huei; Department of Microbiology &amp; Immunology, National Defense Medical Center, Taipei, Taiwan, Department of Microbiology &amp; Immunology, National Defense Medical Center, Taipei, Taiwan</p> <p>Chang, Shan-Yueh; Division of Pulmonary and Critical Care, Department of Internal Medicine, National Defense Medical Center Tri-Service General Hospital, Taipei, Taiwan, Division of Pulmonary and Critical Care, Department of Internal Medicine, National Defense Medical Center Tri-Service General Hospital, Taipei, Taiwan</p> <p>Peng, Chung-Kan; Division of Pulmonary and Critical Care, Department of Internal Medicine, National Defense Medical Center Tri-Service General Hospital, Taipei, Taiwan, Division of Pulmonary and Critical Care, Department of Internal Medicine, National Defense Medical Center Tri-Service General Hospital, Taipei, Taiwan</p> <p>Cheng, Wei-Erh; Division of Chest Medicine, Department of Internal Medicine, Fu Jen Catholic University Hospital, New Taipei City, Taiwan, Division of Chest Medicine, Department of Internal Medicine, Fu Jen Catholic University Hospital, New Taipei City, Taiwan</p> <p>Chien, Wu-Chien; School of Public Health, National Defense Medical Center, Taipei, Taiwan, School of Public Health, National Defense Medical Center, Taipei, Taiwan</p> <p>Shen, Chih-Hao; Division of Pulmonary and Critical Care, Department of Internal Medicine, National Defense Medical Center Tri-Service General Hospital, Taipei, Taiwan, Division of Pulmonary and Critical Care, Department of Internal Medicine, National Defense Medical Center Tri-Service General Hospital, Taipei, Taiwan</p> |
| Keywords:                     | Thoracic medicine < INTERNAL MEDICINE, PUBLIC HEALTH, Spine < ORTHOPAEDIC & TRAUMA SURGERY                                                                                                                                                                                                                                                                                                                                                                                                                                                                                                                                                                                                                                                                                                                                                                                                                                                                                                                                                                                                                                                                                                                                                                                                                                                                                                                                                                                                                                                                                                                                                                                                                                                                                                                                                                                                                                                                                                                                                                                                                                                                                                                                                                                                                                                                                                                                                               |
|                               |                                                                                                                                                                                                                                                                                                                                                                                                                                                                                                                                                                                                                                                                                                                                                                                                                                                                                                                                                                                                                                                                                                                                                                                                                                                                                                                                                                                                                                                                                                                                                                                                                                                                                                                                                                                                                                                                                                                                                                                                                                                                                                                                                                                                                                                                                                                                                                                                                                                          |

1  
2  
3  
4  
5  
6  
7  
8  
9  
10  
11  
12  
13  
14  
15  
16  
17  
18  
19  
20  
21  
22  
23  
24  
25  
26  
27  
28  
29  
30  
31  
32  
33  
34  
35  
36  
37  
38  
39  
40  
41  
42  
43  
44  
45  
46  
47  
48  
49  
50  
51  
52  
53  
54  
55  
56  
57  
58  
59  
60

SCHOLARONE™  
Manuscripts

For peer review only

1  
2  
3  
4 **Association between Spinal Curvatures and Injury: A Nationwide**  
5  
6 **Population-based Retrospective Cohort Study**  
7

8  
9 Yen-Liang Kuo<sup>1,2,3</sup>, Chi-Hsiang Chung<sup>4,5</sup>, Tsai-Wang Huang<sup>6</sup>, Chang-Huei Tsao<sup>7,8</sup>,  
10  
11 Shan-Yueh Chang<sup>3</sup>, Chung-Kan Peng<sup>3</sup>, Wei-Erh Cheng<sup>1,2</sup>, Wu-Chien Chien<sup>5,8\*</sup>,  
12  
13  
14  
15 Chih-Hao Shen<sup>3\*</sup>  
16

17  
18 <sup>1</sup> Division of Chest Medicine, Department of Internal Medicine, Fu Jen Catholic  
19  
20 University Hospital, New Taipei City, Taiwan  
21

22  
23 <sup>2</sup> School of Medicine, College of Medicine, Fu Jen Catholic University, New Taipei  
24  
25 City, Taiwan  
26

27  
28  
29 <sup>3</sup> Division of Pulmonary and Critical Care, Department of Internal Medicine, National  
30  
31 Defense Medical Center Tri-Service General Hospital, Taipei, Taiwan  
32

33  
34 <sup>4</sup> Taiwanese Injury Prevention and Safety Promotion Association, Taipei, Taiwan  
35

36  
37 <sup>5</sup> School of Public Health, National Defense Medical Center, Taipei, Taiwan  
38

39  
40 <sup>6</sup> Division of Thoracic Surgery, Department of Surgery, Tri-Service General Hospital,  
41  
42 National Defense Medical Center, Taipei, Taiwan  
43

44  
45  
46 <sup>7</sup> Department of Microbiology & Immunology, National Defense Medical Center,  
47  
48 Taipei, Taiwan  
49

50  
51 <sup>8</sup> Department of Medical Research, Tri-Service General Hospital and National  
52  
53 Defense Medical Center, Taipei, Taiwan  
54  
55

1  
2  
3  
4 \*These authors contributed equally to this work  
5  
6  
7  
8

9 **Corresponding author:**

10 Chih-Hao Shen;

11  
12  
13 Address: Division of Pulmonary and Critical Care, Department of Internal Medicine,

14  
15 Tri-Service General Hospital, National Defense Medical Center, No.325, Section 2,

16  
17 Cheng-Kung Road, Neihu District, Taipei, 11490, Taiwan;

18  
19  
20 Tel: 886-2- 87923311, Ext. 16883

21  
22 Fax: 886-2- 66008692;

23  
24 E-mail: Potato652@yahoo.com.tw  
25  
26  
27

28 **Word count:** 2,101  
29  
30  
31  
32  
33  
34  
35  
36  
37  
38  
39  
40  
41  
42  
43  
44  
45  
46  
47  
48  
49  
50  
51  
52  
53  
54  
55  
56  
57  
58  
59  
60

## Abstract

**Background and objective:** Injury is an important issue in public health. Spinal curvatures are deformities characterized by abnormal curves of the spine. The prevalence of spinal curvature is not low, but its relationship with injury has not been studied. The aim of this study is to investigate whether spinal curvature increases the risk of injury.

**Methods:** This retrospective cohort study uses data from the Taiwan National Health Insurance Research Database (NHIRD) from 2000 to 2010. Patients with spinal curvatures were selected using codes from the International Classification of Diseases, Ninth Revision, Clinical Modification (ICD-9-CM). A cohort without spinal curvature was randomly frequency-matched to the spinal curvature cohort at a ratio of 2:1 according to age, sex, and index year. The risk of injury was analyzed using Cox's proportional hazards regression models adjusting for age, sex, comorbidities, urbanization level, and socioeconomic status.

**Results:** A total of 20,566 patients with spinal curvatures and 41,132 controls were enrolled in this study. The risk of injury was 2.209 times higher (95% CI 2.118 to 2.303) in patients with spinal curvature than in the control group. The spinal curvature cohort exhibited higher risk of developing injury compared to the control group, regardless of age, sex, comorbidities, urbanization level, and subgroup of spinal

1  
2  
3  
4 curvatures. Based on the subgroup analysis, the spinal curvature cohort had higher  
5  
6 risks of unintentional injury and injury diagnoses such as fracture, dislocation, open  
7  
8 wound, superficial injury/contusion, crushing, and injury to nerves and spinal cord  
9  
10 compared to the control cohort.  
11  
12  
13

14  
15 **Conclusions:** Patients with spinal curvatures have a significantly higher risk of  
16  
17 developing injury than patients without spinal curvatures. Aggressive detection and  
18  
19 management of spinal curvatures may be beneficial for injury prevention.  
20  
21  
22  
23  
24  
25

26 **Short title:** Relationship between spinal curvatures and injury  
27  
28  
29  
30

31  
32 **Keywords:** injury, spinal curvature, kyphosis, lordosis, scoliosis, risk factor  
33  
34  
35  
36  
37

#### 38 **Conflicts of interest**

39  
40 The authors declare that they have no conflict of interest.  
41  
42  
43  
44  
45

#### 46 **Author Contributions:**

47  
48 Yen-Liang Kuo, Chih-Hao Shen and Wu-Chien Chien led the project and interpreted  
49  
50 the data. Chi-Hsiang Chung, Tsai-Wang Huang and Chang-Huei Tsao conducted this  
51  
52 study and analyzed the data. Shan-Yueh Chang, Chung-Kan Peng and Wei-Erh Cheng  
53  
54  
55  
56  
57

1  
2  
3 interpreted the data. Yen-Liang Kuo, Chih-Hao Shen and Wu-Chien Chien wrote the  
4  
5  
6 paper. All authors approved the final version of manuscript.  
7  
8  
9  
10  
11

### 12 **Strengths and limitations of this study:**

- 14 • This is the first nationwide population-based cohort study assessing the  
15 associations between spinal curvature and injury.  
16  
17
- 18 • Patients with spinal curvature have 2.209-fold higher risk of developing injury  
19 compared to those without spinal curvature.  
20  
21
- 22 • Based on the subgroup analysis, the spinal curvature cohort has higher risks of  
23 unintentional injury compared to the control cohort.  
24  
25
- 26 • The main strengths of this study are the large population-based dataset and the  
27 retrospective cohort design which minimize the selection bias and describe the  
28 sequential association between spinal curvature and injury.  
29  
30
- 31 • The main limitation of this study is the characteristic of the database. Detailed  
32 information such as severity of spinal curvature, lifestyle, behavior patterns,  
33 obesity and bone mineral density are not available for further analysis.  
34  
35  
36  
37  
38  
39  
40  
41  
42  
43  
44

### 45 **Ethics**

46  
47 Because data were collected from the Taiwan National Health Insurance Research  
48 Database and 1,000,000 people were randomly selected from the entire population,  
49  
50  
51 personal medical information about an identifiable person is not contained in this  
52  
53  
54  
55  
56  
57  
58  
59  
60



1  
2  
3 database and Ethics Committee/Institutional Review Board approval or patient

4  
5  
6 consent was not necessary.  
7  
8  
9  
10

11  
12 **Funding**  
13

14  
15 There is no funding for this submission.  
16  
17

18  
19  
20 **Data sharing statement**  
21

22  
23 No additional data available.  
24  
25  
26  
27  
28  
29  
30  
31  
32  
33  
34  
35  
36  
37  
38  
39  
40  
41  
42  
43  
44  
45  
46  
47  
48  
49  
50  
51  
52  
53  
54  
55  
56  
57  
58  
59  
60

For peer review only

## Introduction

Spinal curvatures are deformities characterized by abnormal curves of the spine and can be divided into lordosis, kyphosis, and scoliosis. Lordosis refers to anteroposterior angulation and inward curving of the lumbar spine. Kyphosis and scoliosis and can be graded in severity by the Cobb angle (1). Kyphosis is the anteroposterior angulation and outward curve of the thoracic spine. Generally, Cobb angle of normal thoracic spine ranges between 20 and 50 degrees in young people (2, 3). Scoliosis indicates lateral displacement or curvature of the spine. In adult, a curve in spine of 10 degrees or greater of Cobb angle is defined as scoliosis (4). Among community-dwelling individuals  $\geq 60$  years old, the current incidence of spinal curvatures is between 20 and 40 percent (5-7). There are multiple contributing factors to spinal curvature, such as vertebral fractures with low bone density (8-10), short vertebral height as in Scheuermann disease (11), degenerative disc disease (12), postural changes, muscle weakness, and intervertebral ligament degeneration.

Injury is an important issue in public health (13), especially among the elderly (14). Injuries can be divided into several types according to various factors, such as injury diagnosis, cause of injury, or intentionality of injury according to the National Health Insurance Research Database (NHIRD) of Taiwan (15). The occurrence of injury influences the capacity for activity and can cause complications, economic burden,

1  
2  
3  
4 and even mortality (16-19). Thus, determining the modifiable risks and strategies for  
5  
6 the prevention or management of injury deserves more clinical attention.  
7

8  
9 The potential relationship between spinal curvature and injury is not precisely  
10  
11 known. Sinaki et al. demonstrated that thoracic hyperkyphosis in the context of  
12  
13 reduced muscle strength plays an important role in increasing body sway, gait  
14  
15 unsteadiness, and risk of falls in osteoporosis (20). De Groot et al. suggest that  
16  
17 patients with flexed posture (characterized by protrusion of the head and increased  
18  
19 thoracic kyphosis) have impaired postural control during walking and may therefore  
20  
21 have higher risk of falling (21). However, no study has described the sequential  
22  
23 association between curvature of the spine and injury. We conducted a nationwide  
24  
25 population-based cohort study to investigate whether spinal curvature increases the  
26  
27 risk of injury.  
28  
29  
30  
31  
32  
33  
34  
35  
36  
37  
38  
39  
40  
41  
42

## 43 **Materials and Methods**

### 44 **Data sources**

45  
46 Taiwan's NHIRD has been built since Taiwan established a universal health care  
47  
48 system in 1995. This database includes the medical records of the Taiwanese  
49  
50 population of around 23.81 million, and the coverage reached 99.6% in 2016. In this  
51  
52 study, data were collected from the NHIRD, and 1,000,000 people were randomly  
53  
54  
55  
56  
57  
58  
59  
60

1  
2  
3  
4 selected from the entire population. The disease diagnosis codes in the NHIRD  
5  
6 dossier are based on the International Classification of Diseases, Ninth Revision,  
7  
8 Clinical Modification (ICD-9-CM).  
9  
10

### 11 **Study design and sampled participants**

12  
13  
14  
15 This study was a retrospective cohort design. Patients were selected if they were  
16  
17 diagnosed with spinal curvature with  $\geq 3$  outpatient visits and spinal-curvature  
18  
19 inpatients from January 2, 2000, to December 31, 2010, according to the following  
20  
21 ICD-9 codes: kyphosis (ICD-9-CM 737.0, 737.1, 737.41), lordosis (ICD-9-CM 737.2,  
22  
23 737.42), kyphoscoliosis and scoliosis (ICD-9-CM 737.3, 737.43), and unspecified  
24  
25 (ICD-9-CM 737.40, 737.8, 737.9) from the Longitudinal Health Insurance Database  
26  
27 (LHID). Patients were excluded for the following reasons: 1) spinal curvature  
28  
29 diagnosed before 2000, 2) injury before tracing, 3) age  $< 20$  years, and 4) unknown  
30  
31 gender. The patients were divided into four groups based on the ICD codes.  
32  
33  
34  
35  
36  
37  
38  
39

40 For the control cohort, we randomly selected patients without spinal curvature in  
41  
42 this period from among insured individuals. We excluded control subjects according  
43  
44 to the same criteria. The spinal curvature cohort and control cohort were frequency  
45  
46 matched by gender, age, and index rate (Figure 1).  
47  
48  
49  
50

### 51 **Outcome measures**

52  
53  
54 All study participants were followed from the index date until the first diagnosis of  
55  
56

1  
2  
3  
4 injury (ICD-9-CM 800–999), withdrawal from the National Health Insurance (NHI)  
5  
6 program, or the end of 2010. Based on the definition of injury categories from prior  
7  
8 studies (15, 22), the causes of injury were classified as traffic injuries (ICD-9-CM  
9  
10 E800-E849), poisoning (ICD-9-CM E850-E869), falls (ICD-9-CM E880-E888),  
11  
12 burns and fires (ICD-9-CM E890-E899), drowning (ICD-9-CM E910), suffocation  
13  
14 (ICD-9-CM E911-E915), crushing/cutting/piercing (ICD-9-CM E916-E920), other  
15  
16 unintentional injuries (ICD-9-CM E870-E879, E900-E909, E951-E949). The  
17  
18 intentionality categories of injuries include unintentional (ICD-8-CM E800-R949),  
19  
20 intentional (ICD-9-CM E950-E979, E990-E999), and unknown.  
21  
22  
23  
24  
25  
26  
27  
28

### 29 **Comorbidities**

30  
31 Baseline comorbidities include diabetes (ICD-9-CM 250), hypertension  
32  
33 (ICD-9-CM 401 – 405), ischemic heart disease (ICD-9-CM codes 410–414), stroke  
34  
35 (ICD-9-CM 430-438), chronic kidney disease (ICD-9-CM 585), liver cirrhosis  
36  
37 (ICD-9-CM 570, 571, 572.1, 572.4, 573.1–573.3), chronic obstructive lung disease  
38  
39 (ICD-9-CM codes 490, 491, 495, and 496), and cancer (ICD-9-CM 140-208). The  
40  
41 population was also stratified according to the number of comorbidities (0, 1, and  $\geq$   
42  
43 2).  
44  
45  
46  
47  
48  
49  
50

### 51 **Statistical analysis**

52  
53  
54 All analyses were performed using the Statistical Package for the Social Sciences  
55  
56

1  
2  
3  
4 (SPSS) (V.21; SPSS Inc., Chicago, Illinois, USA). Chi squared and t tests were used  
5  
6  
7 to evaluate the distributions of categorical and continuous variables between patients  
8  
9 with spinal curvature and the control group. The incidence rates of injury were  
10  
11 calculated according to gender, age, number of comorbidities, urbanization level, and  
12  
13 insurance premium. Multivariable Cox proportional hazards regression models were  
14  
15 used to determine the risk of injury, which is presented as a hazard ratio (HR) with a  
16  
17 95% confidence interval (CI). The difference in injury risk between the two groups  
18  
19 was estimated using the Kaplan-Meier method with the log-rank test. A two-tailed p  
20  
21 value < 0.05 was considered significant.  
22  
23  
24  
25  
26  
27  
28  
29  
30  
31

## 32 **Results**

33  
34 We enrolled 20,566 patients who had spinal curvature and 41,132 subjects without  
35  
36 spinal curvature in the control group. The majority of patients were  $\geq 65$  years old  
37  
38 (52.82% and 51.58% for spinal curvature and control group, respectively). Females  
39  
40 accounted for more than half of the subjects (64.61%) in each cohort. There is a  
41  
42 significant difference in the number of comorbidities, urbanization level, and  
43  
44 insurance premium between the spinal curvature group and control group (Table 1).  
45  
46  
47  
48  
49 The average period of follow-up was 5.48 years for the spinal curvature cohort and  
50  
51  
52 6.24 years for the control group.  
53  
54  
55  
56  
57  
58  
59  
60

1  
2  
3  
4 Table 2 shows that the incidence of injury was higher in the spinal curvature cohort  
5  
6 than that in the control cohort (10905.25 and 9059.47 incidences per 100,000  
7  
8 person-years, respectively). Compared to the control group, spinal curvature patients  
9  
10 were associated with a significantly higher risk of injury (adjusted HR 2.209 (95% CI  
11  
12 2.118 to 2.303)). The spinal curvature cohort exhibited a higher risk of injury  
13  
14 compared to the control group, regardless of age, sex, comorbidities, and urbanization  
15  
16 level. The risk of injury was also significantly higher in the spinal curvature cohort  
17  
18 than in the control cohort among patients with insurance premiums < 18,000 New  
19  
20 Taiwan dollars (NTD) and 18,000-34,999 NTD. Table 3 shows the risks of injury  
21  
22 stratified by subgroup of spinal curvature (kyphosis, lordosis, kyphoscoliosis and  
23  
24 scoliosis, and unspecified type). All subgroups of spinal curvature had a significantly  
25  
26 higher risk of injury compared to the control cohort (adjusted HR 2.777 (95% CI  
27  
28 2.553 to 3.021), 2.087 (95% CI 1.235 to 3.527), 2.113 (95% CI 2.021 to 2.210), 2.727  
29  
30 (95% CI 2.119 to 3.509), respectively).  
31  
32  
33  
34  
35  
36  
37  
38  
39  
40  
41  
42

43 Table 4 shows the incidence and adjusted HR of injury according to the injury  
44  
45 diagnosis, cause of injury, and intentionality of injury at the end of the follow-up  
46  
47 period. The spinal curvature cohort had a significantly higher risk of unintentionality  
48  
49 of injury compared to the control cohort (adjusted HR 1.537 (95% CI 1.200 to 2.605)).  
50  
51  
52 The spinal curvature cohort had significantly higher risk in injury diagnoses of  
53  
54  
55  
56  
57  
58  
59  
60

1  
2  
3  
4 fracture, dislocation, open wound, superficial injury/contusion, crushing, injury to  
5  
6 nerve and spinal cord, and other injury compared to the control cohort (adjusted HR  
7  
8 1.502 (95% CI 1.398 to 1.614), 1.732 (95% CI 1.172 to 2.558), 1.597 (95% CI 1.310  
9  
10 to 1.939), 1.414 (95% CI 1.131 to 1.761), 4.949 (95% CI 1.093 to 30.895), 2.428  
11  
12 (95% CI 1.310 to 4.500), and 1.387 (95% CI 1.284 to 1.499), respectively). They also  
13  
14 had significantly higher risk of traffic injuries, falls, suffocation,  
15  
16 crushing/cutting/piercing, and other injuries compared to the control cohort (adjusted  
17  
18 HR 1.379 (95% CI 1.191 to 1.597), 1.552 (95% CI 1.429 to 1.686), 6.442 (95% CI  
19  
20 2.335 to 17.776), 2.595 (95% CI 1.056 to 3.409), and 1.612 (95% CI 1.443 to 1.800),  
21  
22 respectively). Significantly higher risk of unintentional injury was also observed in the  
23  
24 spinal curvature cohort (1.537 (95% CI 1.200 to 2.605)).  
25  
26  
27  
28  
29  
30  
31  
32  
33

34 We used Kaplan-Meier survival analysis to assess the cumulative incidence. There  
35  
36 were significant differences in the cumulative incidence of injury among the patients  
37  
38 with and without spinal curvature from the 1st to the 11th follow-up year (log-rank  
39  
40 test;  $p < 0.001$ ) (Figure 2).  
41  
42  
43  
44  
45  
46  
47  
48

## 49 Discussion

50  
51 This is the first nationwide population-based cohort study to investigate the  
52  
53 associations between spinal curvature and injury. We found that patients with spinal  
54  
55  
56  
57  
58  
59  
60



1  
2  
3  
4 curvature had 2.209-fold higher risk of developing injury compared to those without  
5  
6 spinal curvature. Although the spinal curvature and non- spinal curvature cohorts had  
7  
8 different prevalence of comorbidities, urbanization level, and insurance premium on  
9  
10 the index day, spinal curvature remained an independent risk factor for injury in the  
11  
12 adjusted Cox regression analysis. As shown in Table 2, patients in the spinal  
13  
14 curvature cohort had a higher incidence of injury than patients in the control cohort in  
15  
16 most of the subgroup analyses of sex, age, comorbidity, urbanization level and  
17  
18 socioeconomic status. This observation strengthens the finding that spinal curvature  
19  
20 independently increases the risk of injury.  
21  
22  
23  
24  
25  
26  
27  
28

29 For subgroup analysis of injury events, we found that patients with spinal curvature  
30  
31 had higher risk of unintentional injury and injury diagnoses such as fracture,  
32  
33 dislocation, open wound, superficial injury/contusion, crushing, and injury to nerves  
34  
35 and spinal cord. The severity of spinal curvature is defined by the measurement of the  
36  
37 Cobb angle of curvature (1). Chest wall compliance decreases in severe cases, which  
38  
39 leads to difficulty in breathing, increased risk of respiratory muscle fatigue (23, 24),  
40  
41 increased dead space fraction, alveolar hypoventilation with hypercapnia (25),  
42  
43 hypoxemia (26), ventilation-perfusion mismatch, apneic events with nocturnal  
44  
45 hypoventilation and arterial oxygen desaturation (23, 27), and exercise limitations (28,  
46  
47  
48  
49  
50  
51  
52  
53  
54  
55  
56  
57  
58  
59  
60 29). Previous studies also suggest that spinal curvature is associated with reduced

1  
2  
3  
4 muscle strength, increased body sway, and gait unsteadiness (20, 30-32). The  
5  
6 increased risk of unintentional injury in our study may be explained by these systemic  
7  
8 manifestations of spinal curvature.  
9  
10

11  
12 We found that patients with spinal curvature had higher risks of various injury  
13  
14 causes, such as traffic injuries, falls, suffocation, crushing/cutting/piercing, and other  
15  
16 unintentional injuries. Among these causes, risk of suffocation (adjusted HR 6.442)  
17  
18 was much higher than that of other injuries. Although respiratory muscle fatigue (15,  
19  
20 16) and lung function impairment were found in patients with spinal curvature (17),  
21  
22 there are insufficient studies explaining the mechanism between spinal curvature and  
23  
24 suffocation. Further studies for analyzing this correlation are warranted.  
25  
26  
27  
28  
29  
30

31  
32 After stratifying patients with injury by age, we found that the adjusted HR of  
33  
34 subjects aged 20 to 40 years and 41 to 64 years were much higher than in those aged  
35  
36 65 years and above (adjusted HR, 6.665, 6.154, and 1.666, respectively). This  
37  
38 contrasts with the concept that injury risk is higher among the elderly, especially for  
39  
40 fracture due to car crashes (33). It is possible that daily activity among the younger  
41  
42 population with spinal curvature is not limited, and the risk of injury is increased due  
43  
44 to balance disorder and impaired postural control (34).  
45  
46  
47  
48  
49  
50

51  
52 The treatment of spinal curvature includes supportive care, bracing, pulmonary  
53  
54 rehabilitation, noninvasive ventilation, and surgery (35-39). Treatment may also  
55  
56

1  
2  
3  
4 improve pulmonary function, exercise capacity, and arterial blood gas, as well as  
5  
6 eliminate obstructive apnea (40). Since spinal curvature was associated with higher  
7  
8 risk of injury, providing assistive devices or protective gear to patients with spinal  
9  
10 curvature may decrease the incidence of injury and may be practical for public health.  
11  
12  
13  
14  
15 Future studies focusing on the association between early detection, adequate treatment  
16  
17 of spinal curvature, and the prevention of injury are warranted.  
18  
19

20  
21 This study has some limitations. Firstly, the severity of spinal curvatures, the  
22  
23 subjective symptoms and physical examinations were not recorded, which might  
24  
25 confound the incidence rate of spinal curvatures. Secondly, there is no information on  
26  
27 patient characteristics from the NHIRD. The data lacked information about smoking,  
28  
29 dietary habits, alcoholism, substance use, obesity and bone mineral density, which  
30  
31 might influence the time and incidence rate of injury occurrence. Thirdly, the severity  
32  
33 of injuries that would impact the patient's daily life was not evaluated. Fourthly, other  
34  
35 bias might remain in this retrospective cohort study, despite the meticulous adjustment  
36  
37 of the model for potential confounders.  
38  
39  
40  
41  
42  
43  
44  
45

46  
47 In conclusion, our study suggests that patient with spinal curvature exhibit higher  
48  
49 risk of developing injury than patients without spinal curvature, especially the risks of  
50  
51 unintentional injury and injury diagnoses such as fracture, dislocation, open wound,  
52  
53 superficial injury/contusion, crushing, and injury to nerves and spinal cord.  
54  
55  
56

1  
2  
3  
4 Aggressive detection and management of patients with spinal curvature may be  
5  
6  
7 beneficial for injury prevention from a public health perspective.  
8  
9  
10

## 11 Reference

- 14 1. JR C. Outline for the study of scoliosis. . American Academy of Orthopaedic  
15 Surgeons Instr Course Lect. 1948;5:15.
- 16 2. Fon GT, Pitt MJ, Thies AC, Jr. Thoracic kyphosis: range in normal subjects. AJR  
17 Am J Roentgenol. 1980;134(5):979-83.
- 18 3. Boseker EH, Moe JH, Winter RB, Koop SE. Determination of "normal" thoracic  
19 kyphosis: a roentgenographic study of 121 "normal" children. J Pediatr Orthop.  
20 2000;20(6):796-8.
- 21 4. Kane WJ. Scoliosis prevalence: a call for a statement of terms. Clin Orthop Relat  
22 Res. 1977(126):43-6.
- 23 5. Kado DM, Huang MH, Karlamangla AS, Barrett-Connor E, Greendale GA.  
24 Hyperkyphotic posture predicts mortality in older community-dwelling men and  
25 women: a prospective study. J Am Geriatr Soc. 2004;52(10):1662-7.
- 26 6. Ryan SD, Fried LP. The impact of kyphosis on daily functioning. J Am Geriatr  
27 Soc. 1997;45(12):1479-86.
- 28 7. Takahashi T, Ishida K, Hirose D, Nagano Y, Okumiya K, Nishinaga M, et al.  
29 Trunk deformity is associated with a reduction in outdoor activities of daily living and  
30 life satisfaction in community-dwelling older people. Osteoporos Int.  
31 2005;16(3):273-9.
- 32 8. Ensrud KE, Black DM, Harris F, Ettinger B, Cummings SR. Correlates of  
33 kyphosis in older women. The Fracture Intervention Trial Research Group. J Am  
34 Geriatr Soc. 1997;45(6):682-7.
- 35 9. Kado DM, Huang MH, Karlamangla AS, Cawthon P, Katzman W, Hillier TA, et  
36 al. Factors associated with kyphosis progression in older women: 15 years' experience  
37 in the study of osteoporotic fractures. J Bone Miner Res. 2013;28(1):179-87.
- 38 10. Pavlovic A, Nichols DL, Sanborn CF, Dimarco NM. Relationship of thoracic  
39 kyphosis and lumbar lordosis to bone mineral density in women. Osteoporos Int.  
40 2013;24(8):2269-73.
- 41 11. Axenovich TI, Zaidman AM, Zorkoltseva IV, Kalashnikova EV, Borodin PM.  
42 Segregation analysis of Scheuermann disease in ninety families from Siberia. Am J  
43 Med Genet. 2001;100(4):275-9.

12. Schneider DL, von Muhlen D, Barrett-Connor E, Sartoris DJ. Kyphosis does not equal vertebral fractures: the Rancho Bernardo study. *J Rheumatol*. 2004;31(4):747-52.
13. Haagsma JA, Graetz N, Bolliger I, Naghavi M, Higashi H, Mullany EC, et al. The global burden of injury: incidence, mortality, disability-adjusted life years and time trends from the Global Burden of Disease study 2013. *Injury prevention : journal of the International Society for Child and Adolescent Injury Prevention*. 2016;22(1):3-18.
14. Yeo YY, Lee SK, Lim CY, Quek LS, Ooi SB. A review of elderly injuries seen in a Singapore emergency department. *Singapore Med J*. 2009;50(3):278-83.
15. Chien WC, Chung CH, Lai CH, Chou CH. A retrospective population-based study of injury types among elderly in Taiwan. *International journal of injury control and safety promotion*. 2014;21(1):3-8.
16. National estimates of the ten leading causes of nonfatal injuries, Centers for Disease Control and Prevention. CDC. 2004;[www.cdc.gov/injury/wisqars.html](http://www.cdc.gov/injury/wisqars.html) (Accessed on May 24, 2010).
17. Mackenzie EJ, Rivara FP, Jurkovich GJ, Nathens AB, Frey KP, Egleston BL, et al. The National Study on Costs and Outcomes of Trauma. *J Trauma*. 2007;63(6 Suppl):S54-67; discussion S81-6.
18. Global burden of disease. World Health Organization. 2010; [www.who.int/healthinfo/global\\_burden\\_disease/en/](http://www.who.int/healthinfo/global_burden_disease/en/) (Accessed on May 01, 2010).
19. Global Status on Road Safety. World Health Organization. 2015;[http://www.who.int/violence\\_injury\\_prevention/road\\_safety\\_status/2015/](http://www.who.int/violence_injury_prevention/road_safety_status/2015/) (Accessed on April 04, 2016).
20. Sinaki M, Brey RH, Hughes CA, Larson DR, Kaufman KR. Balance disorder and increased risk of falls in osteoporosis and kyphosis: significance of kyphotic posture and muscle strength. *Osteoporos Int*. 2005;16(8):1004-10.
21. de Groot MH, van der Jagt-Willems HC, van Campen JP, Lems WF, Beijnen JH, Lamoth CJ. A flexed posture in elderly patients is associated with impairments in postural control during walking. *Gait Posture*. 2014;39(2):767-72.
22. Lin CL, Chung CH, Tsai YH, Chien WC. Association between sleep disorders and injury: a nationwide population-based retrospective cohort study. *Injury prevention : journal of the International Society for Child and Adolescent Injury Prevention*. 2016;22(5):342-6.
23. Jones RS, Kennedy JD, Hasham F, Owen R, Taylor JF. Mechanical inefficiency of the thoracic cage in scoliosis. *Thorax*. 1981;36(6):456-61.
24. Di Bari M, Chiarlone M, Matteuzzi D, Zacchei S, Pozzi C, Bellia V, et al. Thoracic kyphosis and ventilatory dysfunction in unselected older persons: an

- 1  
2  
3 epidemiological study in Dicomano, Italy. *J Am Geriatr Soc.* 2004;52(6):909-15.
- 4 25. Bergofsky EH, Turino GM, Fishman AP. Cardiorespiratory failure in  
5 kyphoscoliosis. *Medicine (Baltimore).* 1959;38:263-317.
- 6 26. Naeye RL. Kyphoscoliosis and cor pulmonale; a study of the pulmonary vascular  
7 bed. *Am J Pathol.* 1961;38:561-73.
- 8 27. Shannon DC, Riseborough EJ, Kazemi H. Ventilation perfusion relationships  
9 following correction of kyphoscoliosis. *JAMA.* 1971;217(5):579-84.
- 10 28. Shneerson JM. The cardiorespiratory response to exercise in thoracic scoliosis.  
11 *Thorax.* 1978;33(4):457-63.
- 12 29. Kesten S, Garfinkel SK, Wright T, Rebeck AS. Impaired exercise capacity in  
13 adults with moderate scoliosis. *Chest.* 1991;99(3):663-6.
- 14 30. Lynn SG, Sinaki M, Westerlind KC. Balance characteristics of persons with  
15 osteoporosis. *Arch Phys Med Rehabil.* 1997;78(3):273-7.
- 16 31. de Groot MH, van der Jagt-Willems HC, van Campen JP, Lems WF, Lamoth CJ.  
17 Testing postural control among various osteoporotic patient groups: a literature  
18 review. *Geriatr Gerontol Int.* 2012;12(4):573-85.
- 19 32. Katzman WB, Vittinghoff E, Kado DM, Lane NE, Ensrud KE, Shipp K. Thoracic  
20 kyphosis and rate of incident vertebral fractures: the Fracture Intervention Trial.  
21 *Osteoporos Int.* 2016;27(3):899-903.
- 22 33. Brorsson B. Age and injury severity. *Scand J Soc Med.* 1989;17(4):287-90.
- 23 34. Gauchard GC, Lascombes P, Kuhnast M, Perrin PP. Influence of different types  
24 of progressive idiopathic scoliosis on static and dynamic postural control. *Spine (Phila  
25 Pa 1976).* 2001;26(9):1052-8.
- 26 35. Skaggs DL, Bassett GS. Adolescent idiopathic scoliosis: an update. *Am Fam  
27 Physician.* 1996;53(7):2327-35.
- 28 36. Weinstein SL, Dolan LA, Wright JG, Dobbs MB. Effects of bracing in  
29 adolescents with idiopathic scoliosis. *N Engl J Med.* 2013;369(16):1512-21.
- 30 37. Negrini S, Minozzi S, Bettany-Saltikov J, Chockalingam N, Grivas TB,  
31 Kotwicki T, et al. Braces for idiopathic scoliosis in adolescents. *Cochrane Database  
32 Syst Rev.* 2015(6):CD006850.
- 33 38. Fuschillo S, De Felice A, Martucci M, Gaudiosi C, Pisano V, Vitale D, et al.  
34 Pulmonary rehabilitation improves exercise capacity in subjects with kyphoscoliosis  
35 and severe respiratory impairment. *Respir Care.* 2015;60(1):96-101.
- 36 39. Obayashi H, Urabe Y, Yamanaka Y, Okuma R. Effects of respiratory-muscle  
37 exercise on spinal curvature. *J Sport Rehabil.* 2012;21(1):63-8.
- 38 40. Menon B, Aggarwal B. Influence of spinal deformity on pulmonary function,  
39 arterial blood gas values, and exercise capacity in thoracic kyphoscoliosis.  
40 *Neurosciences (Riyadh).* 2007;12(4):293-8.
- 41  
42  
43  
44  
45  
46  
47  
48  
49  
50  
51  
52  
53  
54  
55  
56  
57  
58  
59  
60

## Figure Legends

**Figure 1.** Flowchart of the study

**Figure 2.** Kaplan-Meier curve for cumulative risk of injury

**Table 1. Demographic data for patients with and without spinal curvature**

| Variables                      | Curvature of the spine |       |         |       | <i>p</i> value |
|--------------------------------|------------------------|-------|---------|-------|----------------|
|                                | with                   |       | without |       |                |
|                                | n                      | %     | n       | %     |                |
| <b>Total</b>                   | 20,566                 | 33.33 | 41,132  | 66.67 |                |
| <b>Gender</b>                  |                        |       |         |       | 0.999          |
| Male                           | 7,279                  | 35.39 | 14,558  | 35.39 |                |
| Female                         | 13,287                 | 64.61 | 26,574  | 64.61 |                |
| <b>Age group (years)</b>       |                        |       |         |       | 0.999          |
| 20-40                          | 3,107                  | 15.11 | 6,529   | 15.87 |                |
| 41-64                          | 6,597                  | 32.08 | 13,386  | 32.54 |                |
| ≥ 65                           | 10,862                 | 52.82 | 21,217  | 51.58 |                |
| <b>Number of comorbidities</b> |                        |       |         |       | <0.001         |
| 0                              | 12,469                 | 60.63 | 19,513  | 47.44 |                |
| 1                              | 6,074                  | 29.53 | 12,021  | 29.23 |                |

|                                 |        |       |        |       |        |
|---------------------------------|--------|-------|--------|-------|--------|
| $\geq 2$                        | 2,023  | 9.84  | 9,598  | 23.33 |        |
| <b>Urbanization level</b>       |        |       |        |       | <0.001 |
| 1 (The highest)                 | 8,147  | 39.61 | 14,344 | 34.87 |        |
| 2                               | 7,807  | 37.96 | 17,780 | 43.23 |        |
| 3                               | 2,021  | 9.83  | 2,946  | 7.16  |        |
| 4 (The lowest)                  | 2,591  | 12.60 | 6,062  | 14.74 |        |
| <b>Insurance premium (NT\$)</b> |        |       |        |       | <0.001 |
| <18,000                         | 20,193 | 98.19 | 40,541 | 98.56 |        |
| 18,000-34,999                   | 324    | 1.58  | 482    | 1.17  |        |
| $\geq 35,000$                   | 49     | 0.24  | 109    | 0.27  |        |



**Table 2. Risk of injury stratified by variables**

| Variables                      | With curvature of the spine |           |                               | Without curvature of the spine |           |                               | Ratio | Adjusted HR†(95%CI)   |
|--------------------------------|-----------------------------|-----------|-------------------------------|--------------------------------|-----------|-------------------------------|-------|-----------------------|
|                                | Event                       | PYs       | IR‡ (per 10 <sup>5</sup> PYs) | Event                          | PYs       | IR‡ (per 10 <sup>5</sup> PYs) |       |                       |
| <b>Total</b>                   | 3,617                       | 33,167.52 | 10,905.25                     | 6,254                          | 69,032.77 | 9,059.47                      | 1.204 | 2.209 (2.118-2.303) * |
| <b>Gender</b>                  |                             |           |                               |                                |           |                               |       |                       |
| Male                           | 1,308                       | 12,003.99 | 10,896.38                     | 2,288                          | 24,100.91 | 9,493.42                      | 1.148 | 2.098 (1.958-2.249) * |
| Female                         | 2,309                       | 21,163.52 | 10,910.28                     | 3,966                          | 44,931.86 | 8,826.70                      | 1.236 | 2.279 (2.162-2.402) * |
| <b>Age group (years)</b>       |                             |           |                               |                                |           |                               |       |                       |
| 20-40                          | 289                         | 2,945.11  | 9,812.88                      | 177                            | 6,082.11  | 2,910.17                      | 3.372 | 6.665 (5.512-8.060) * |
| 41-64                          | 885                         | 7,561.59  | 11,703.89                     | 603                            | 8,360.88  | 7,212.16                      | 1.623 | 6.154 (5.527-6.852) * |
| ≥65                            | 2,443                       | 22,660.82 | 10,780.72                     | 5,474                          | 54,589.78 | 10,027.52                     | 1.075 | 1.666 (1.587-1.749) * |
| <b>Number of comorbidities</b> |                             |           |                               |                                |           |                               |       |                       |
| 0                              | 2,008                       | 14,400.78 | 13,943.69                     | 2,653                          | 22,738.69 | 11,667.34                     | 1.195 | 2.424 (2.284-2.572) * |
| 1                              | 1,142                       | 11,337.55 | 10,072.72                     | 2,077                          | 21,977.53 | 9,450.56                      | 1.066 | 2.203 (2.047-2.371) * |
| ≥2                             | 467                         | 7,429.19  | 6,286.02                      | 1,524                          | 24,316.54 | 6,267.34                      | 1.003 | 1.674 (1.507-1.860) * |
| <b>Urbanization level</b>      |                             |           |                               |                                |           |                               |       |                       |
| 1 (The highest)                | 1,012                       | 9,790.98  | 10,336.04                     | 1,759                          | 20,803.62 | 8,455.26                      | 1.222 | 2.225 (2.056-2.409) * |

|                                 |       |           |           |       |           |           |       |                        |
|---------------------------------|-------|-----------|-----------|-------|-----------|-----------|-------|------------------------|
| 2                               | 1,522 | 14,516.01 | 10,484.97 | 2,813 | 31,263.20 | 8,997.80  | 1.165 | 2.145 (2.012-2.285) *  |
| 3                               | 325   | 2,422.89  | 13,413.73 | 463   | 4,925.73  | 9,399.62  | 1.427 | 2.766 (2.390-3.202) *  |
| 4 (The lowest)                  | 758   | 6,437.64  | 11,774.50 | 1,219 | 12,040.22 | 10,124.40 | 1.163 | 2.131 (1.942-2.339) *  |
| <b>Insurance premium (NT\$)</b> |       |           |           |       |           |           |       |                        |
| <18,000                         | 3,545 | 32,458.79 | 10,921.54 | 6,161 | 67,962.43 | 9,065.30  | 1.205 | 2.210 (2.118-2.305) *  |
| 18,000-34,999                   | 68    | 643.84    | 10,561.63 | 88    | 965.58    | 9,113.69  | 1.159 | 2.297 (1.651-3.194) *  |
| ≥35,000                         | 4     | 64.89     | 6,164.28  | 5     | 104.76    | 4,772.81  | 1.292 | 1.868 (0.430-8.119) ** |

\*p<0.001; \*\*p=0.405

†Adjusted HR: multivariable analysis including gender, age, number of comorbidities, urbanization level, and insurance premium.

‡Indicates incidence rate per 100,000 person-years.

IR, incidence rate; PYs = Person-years; Adjusted HR = Adjusted Hazard ratio; CI = confidence interval

**Table 3. Risk of injury stratified by subgroup of spinal curvature**

| Curvature of the spine       | Crude HR (95% CI) | Adjusted HR † (95%CI)    |
|------------------------------|-------------------|--------------------------|
| Kyphosis                     |                   |                          |
| With                         | 1.579             | 2.777 (2.553 - 3.021) *  |
| Without                      | 1 (Reference)     | 1 (Reference)            |
| Lordosis                     |                   |                          |
| With                         | 1.033             | 2.087 (1.235 - 3.527) ** |
| Without                      | 1 (Reference)     | 1 (Reference)            |
| Kyphoscoliosis and scoliosis |                   |                          |
| With                         | 1.146             | 2.113(2.201 - 2.210) *   |
| Without                      | 1 (Reference)     | 1 (Reference)            |
| Unspecified                  |                   |                          |
| With                         | 1.388             | 2.727(2.119 - 3.509) *   |
| Without                      | 1 (Reference)     | 1 (Reference)            |

ICD-9-CM code: kyphosis (ICD-9-CM 737.0, 737.1, 737.41), lordosis (ICD-9-CM 737.2, 737.42), kyphoscoliosis and scoliosis (ICD-9-CM 737.3, 737.43), and unspecified (ICD-9-CM 737.40, 737.8, 737.9)

ICD-9-CM, International Classification of Diseases, Ninth Revision, Clinical

1  
2  
3  
4 Modification

5  
6 \*p< 0.001

7  
8  
9 \*\*p=0.006

10  
11  
12 †Adjusted HR: multivariable analysis including gender, age, comorbidities,  
13  
14 urbanization level, and insurance premium.

15  
16  
17 Adjusted HR = Adjusted Hazard ratio; CI = confidence interval  
18  
19  
20  
21  
22  
23  
24  
25  
26  
27  
28  
29  
30  
31  
32  
33  
34  
35  
36  
37  
38  
39  
40  
41  
42  
43  
44  
45  
46  
47  
48  
49  
50  
51  
52  
53  
54  
55  
56  
57  
58  
59  
60

**Table 4. Risk of injury stratified by injury diagnosis, cause of injury, and intentionality of injury in the end of follow-up**

|                                       | Crude HR (95%CI) | Adjusted HR † (95%CI)  |
|---------------------------------------|------------------|------------------------|
| <b>Injury diagnosis</b>               |                  |                        |
| Fracture                              | 1.193            | 1.502 (1.398-1.614) *  |
| Dislocation                           | 1.859            | 1.732 (1.172-2.558) *  |
| Sprains and strains                   | 1.510            | 1.341 (0.927-1.942)    |
| Intracranial/internal injury          | 0.835            | 0.996 (0.808-1.501)    |
| Open wound                            | 1.244            | 1.597 (1.310-1.939) *  |
| Injury to blood vessels               | 0.297            | 0.287 (0.007-11.122)   |
| Superficial injury/contusion          | 1.321            | 1.414 (1.131-1.761) *  |
| Crushing                              | 4.460            | 4.949 (1.093-30.895) * |
| Foreign body entering through orifice | 1.469            | 1.921 (0.970-3.803)    |
| Burn                                  | 2.018            | 1.453 (0.968-2.180)    |
| Injury to nerves and spinal cord      | 2.379            | 2.428 (1.310-4.500) *  |
| Poisoning                             | 0.999            | 0.983 (0.809-1.602)    |
| Others injury                         | 1.270            | 1.387 (1.284-1.499) *  |

| <b>Cause of injury</b>          |       |                        |
|---------------------------------|-------|------------------------|
| Traffic injuries                | 1.370 | 1.379 (1.191-1.597) *  |
| Poisoning                       | 1.150 | 1.423 (0.906-2.234)    |
| Falls                           | 1.258 | 1.552 (1.429-1.686) *  |
| Burns and fires                 | 2.498 | 1.567 (0.977-2.567)    |
| Drowning                        | N/A   | N/A                    |
| Suffocation                     | 1.972 | 6.442 (2.335-17.776) * |
| Crushing/cutting/piercing       | 1.788 | 2.595 (1.056-3.409) *  |
| Other injuries                  | 1.401 | 1.612 (1.443-1.800) *  |
| <b>Intentionality of injury</b> |       |                        |
| Unitentional                    | 1.335 | 1.537 (1.200-2.605) *  |
| Intentional                     | 2.330 | 2.218 (0.994-3.424)    |
| Unknown                         | 1.095 | 1.076 (0.419-1.830)    |

\*p<0.05

Some patients did not provide information about cause and intentionality of injury

†Adjusted HR: multivariable analysis including gender, age, comorbidities, urbanization level, and insurance premium.

Adjusted HR = Adjusted Hazard ratio; CI = confidence interval

N/A: non-applicable due to only one drowning event in spine curvature patients and

1  
2  
3  
4  
5  
6  
7  
8  
9  
10  
11  
12  
13  
14  
15  
16  
17  
18  
19  
20  
21  
22  
23  
24  
25  
26  
27  
28  
29  
30  
31  
32  
33  
34  
35  
36  
37  
38  
39  
40  
41  
42  
43  
44  
45  
46  
47  
48  
49  
50  
51  
52  
53  
54  
55  
56  
57  
58  
59  
60

no drowning event in the control group.

For peer review only

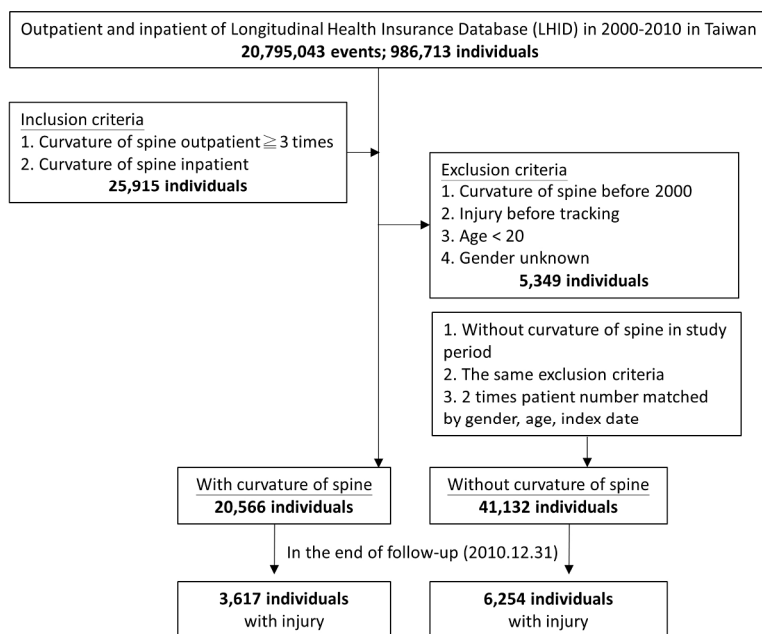

**Figure 1.** The flowchart of study sample selection from National Health Insurance Research Database in Taiwan

190x274mm (284 x 284 DPI)



1  
2  
3  
4  
5  
6  
7  
8  
9  
10  
11  
12  
13  
14  
15  
16  
17  
18  
19  
20  
21  
22  
23  
24  
25  
26  
27  
28  
29  
30  
31  
32  
33  
34  
35  
36  
37  
38  
39  
40  
41  
42  
43  
44  
45  
46  
47  
48  
49  
50  
51  
52  
53  
54  
55  
56  
57  
58  
59  
60

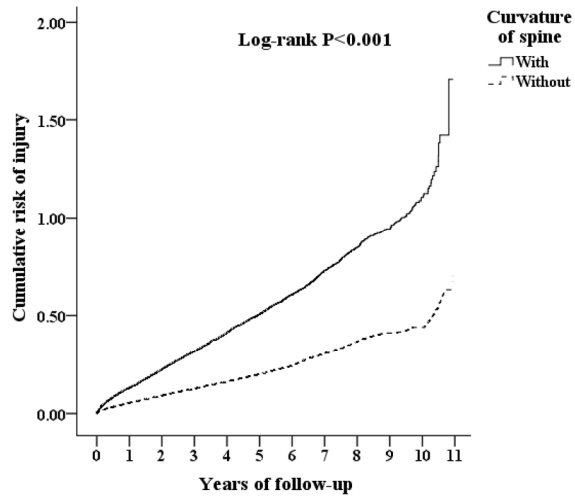

**Figure 2.** Kaplan-Meier for cumulative risk of injury among aged 20 over stratified by curvature of spine with log-rank test

190x274mm (284 x 284 DPI)

STROBE Statement—Checklist of items that should be included in reports of *cohort studies*

|                              | Item No | Recommendation                                                                                                                                                                                                                                                                                                                                                                                                |
|------------------------------|---------|---------------------------------------------------------------------------------------------------------------------------------------------------------------------------------------------------------------------------------------------------------------------------------------------------------------------------------------------------------------------------------------------------------------|
| <b>Title and abstract</b>    | 1       | (a) Indicate the study's design with a commonly used term in the title or the abstract<br>(b) Provide in the abstract an informative and balanced summary of what was done and what was found                                                                                                                                                                                                                 |
| <b>Introduction</b>          |         |                                                                                                                                                                                                                                                                                                                                                                                                               |
| Background/rationale         | 2       | Explain the scientific background and rationale for the investigation being reported                                                                                                                                                                                                                                                                                                                          |
| Objectives                   | 3       | State specific objectives, including any prespecified hypotheses                                                                                                                                                                                                                                                                                                                                              |
| <b>Methods</b>               |         |                                                                                                                                                                                                                                                                                                                                                                                                               |
| Study design                 | 4       | Present key elements of study design early in the paper                                                                                                                                                                                                                                                                                                                                                       |
| Setting                      | 5       | Describe the setting, locations, and relevant dates, including periods of recruitment, exposure, follow-up, and data collection                                                                                                                                                                                                                                                                               |
| Participants                 | 6       | (a) Give the eligibility criteria, and the sources and methods of selection of participants. Describe methods of follow-up<br>(b) For matched studies, give matching criteria and number of exposed and unexposed                                                                                                                                                                                             |
| Variables                    | 7       | Clearly define all outcomes, exposures, predictors, potential confounders, and effect modifiers. Give diagnostic criteria, if applicable                                                                                                                                                                                                                                                                      |
| Data sources/<br>measurement | 8*      | For each variable of interest, give sources of data and details of methods of assessment (measurement). Describe comparability of assessment methods if there is more than one group                                                                                                                                                                                                                          |
| Bias                         | 9       | Describe any efforts to address potential sources of bias                                                                                                                                                                                                                                                                                                                                                     |
| Study size                   | 10      | Explain how the study size was arrived at                                                                                                                                                                                                                                                                                                                                                                     |
| Quantitative variables       | 11      | Explain how quantitative variables were handled in the analyses. If applicable, describe which groupings were chosen and why                                                                                                                                                                                                                                                                                  |
| Statistical methods          | 12      | (a) Describe all statistical methods, including those used to control for confounding<br>(b) Describe any methods used to examine subgroups and interactions<br>(c) Explain how missing data were addressed<br>(d) If applicable, explain how loss to follow-up was addressed<br>(e) Describe any sensitivity analyses                                                                                        |
| <b>Results</b>               |         |                                                                                                                                                                                                                                                                                                                                                                                                               |
| Participants                 | 13*     | (a) Report numbers of individuals at each stage of study—eg numbers potentially eligible, examined for eligibility, confirmed eligible, included in the study, completing follow-up, and analysed<br>(b) Give reasons for non-participation at each stage<br>(c) Consider use of a flow diagram                                                                                                               |
| Descriptive data             | 14*     | (a) Give characteristics of study participants (eg demographic, clinical, social) and information on exposures and potential confounders<br>(b) Indicate number of participants with missing data for each variable of interest<br>(c) Summarise follow-up time (eg, average and total amount)                                                                                                                |
| Outcome data                 | 15*     | Report numbers of outcome events or summary measures over time                                                                                                                                                                                                                                                                                                                                                |
| Main results                 | 16      | (a) Give unadjusted estimates and, if applicable, confounder-adjusted estimates and their precision (eg, 95% confidence interval). Make clear which confounders were adjusted for and why they were included<br>(b) Report category boundaries when continuous variables were categorized<br>(c) If relevant, consider translating estimates of relative risk into absolute risk for a meaningful time period |

|    |                          |    |                                                                                        |
|----|--------------------------|----|----------------------------------------------------------------------------------------|
| 1  | Other analyses           | 17 | Report other analyses done—eg analyses of subgroups and interactions, and              |
| 2  |                          |    | sensitivity analyses                                                                   |
| 3  | <b>Discussion</b>        |    |                                                                                        |
| 4  | Key results              | 18 | Summarise key results with reference to study objectives                               |
| 5  | Limitations              | 19 | Discuss limitations of the study, taking into account sources of potential bias or     |
| 6  |                          |    | imprecision. Discuss both direction and magnitude of any potential bias                |
| 7  | Interpretation           | 20 | Give a cautious overall interpretation of results considering objectives, limitations, |
| 8  |                          |    | multiplicity of analyses, results from similar studies, and other relevant evidence    |
| 9  | Generalisability         | 21 | Discuss the generalisability (external validity) of the study results                  |
| 10 | <b>Other information</b> |    |                                                                                        |
| 11 | Funding                  | 22 | Give the source of funding and the role of the funders for the present study and, if   |
| 12 |                          |    | applicable, for the original study on which the present article is based               |

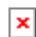

## Association between Spinal Curvature Disorders and Injury: A Nationwide Population-based Retrospective Cohort Study

|                               |                                                                                                                                                                                                                                                                                                                                                                                                                                                                                                                                                                                                                                                                                                                                                                                                                                                                                                                                                                                                                                                                                                                                                                                                                                                                                                                                                                                                                                                                                                                                                                                                                                                                                                                                                                                                                                                                                                                                                                                                                                                                                                                                                                                                                                                                                                                                                                                                                                                                                                                                                                                                                                                                                                                                                                                                                                                  |
|-------------------------------|--------------------------------------------------------------------------------------------------------------------------------------------------------------------------------------------------------------------------------------------------------------------------------------------------------------------------------------------------------------------------------------------------------------------------------------------------------------------------------------------------------------------------------------------------------------------------------------------------------------------------------------------------------------------------------------------------------------------------------------------------------------------------------------------------------------------------------------------------------------------------------------------------------------------------------------------------------------------------------------------------------------------------------------------------------------------------------------------------------------------------------------------------------------------------------------------------------------------------------------------------------------------------------------------------------------------------------------------------------------------------------------------------------------------------------------------------------------------------------------------------------------------------------------------------------------------------------------------------------------------------------------------------------------------------------------------------------------------------------------------------------------------------------------------------------------------------------------------------------------------------------------------------------------------------------------------------------------------------------------------------------------------------------------------------------------------------------------------------------------------------------------------------------------------------------------------------------------------------------------------------------------------------------------------------------------------------------------------------------------------------------------------------------------------------------------------------------------------------------------------------------------------------------------------------------------------------------------------------------------------------------------------------------------------------------------------------------------------------------------------------------------------------------------------------------------------------------------------------|
| Journal:                      | <i>BMJ Open</i>                                                                                                                                                                                                                                                                                                                                                                                                                                                                                                                                                                                                                                                                                                                                                                                                                                                                                                                                                                                                                                                                                                                                                                                                                                                                                                                                                                                                                                                                                                                                                                                                                                                                                                                                                                                                                                                                                                                                                                                                                                                                                                                                                                                                                                                                                                                                                                                                                                                                                                                                                                                                                                                                                                                                                                                                                                  |
| Manuscript ID                 | bmjopen-2018-023604.R1                                                                                                                                                                                                                                                                                                                                                                                                                                                                                                                                                                                                                                                                                                                                                                                                                                                                                                                                                                                                                                                                                                                                                                                                                                                                                                                                                                                                                                                                                                                                                                                                                                                                                                                                                                                                                                                                                                                                                                                                                                                                                                                                                                                                                                                                                                                                                                                                                                                                                                                                                                                                                                                                                                                                                                                                                           |
| Article Type:                 | Research                                                                                                                                                                                                                                                                                                                                                                                                                                                                                                                                                                                                                                                                                                                                                                                                                                                                                                                                                                                                                                                                                                                                                                                                                                                                                                                                                                                                                                                                                                                                                                                                                                                                                                                                                                                                                                                                                                                                                                                                                                                                                                                                                                                                                                                                                                                                                                                                                                                                                                                                                                                                                                                                                                                                                                                                                                         |
| Date Submitted by the Author: | 26-Jul-2018                                                                                                                                                                                                                                                                                                                                                                                                                                                                                                                                                                                                                                                                                                                                                                                                                                                                                                                                                                                                                                                                                                                                                                                                                                                                                                                                                                                                                                                                                                                                                                                                                                                                                                                                                                                                                                                                                                                                                                                                                                                                                                                                                                                                                                                                                                                                                                                                                                                                                                                                                                                                                                                                                                                                                                                                                                      |
| Complete List of Authors:     | <p>Kuo, Yen-Liang; Division of Chest Medicine, Department of Internal Medicine, Fu Jen Catholic University Hospital, New Taipei City, Taiwan, Division of Chest Medicine, Department of Internal Medicine, Fu Jen Catholic University Hospital, New Taipei City, Taiwan; School of Medicine, College of Medicine, Fu Jen Catholic University, New Taipei City, Taiwan, School of Medicine, College of Medicine, Fu Jen Catholic University, New Taipei City, Taiwan</p> <p>Chung, Chi-Hsiang; School of Public Health, National Defense Medical Center, Taipei, Taiwan, School of Public Health, National Defense Medical Center, Taipei, Taiwan</p> <p>Huang, Tsai-Wang; Division of Thoracic Surgery, Department of Surgery, Tri-Service General Hospital, National Defense Medical Center, Taipei, Taiwan, Division of Thoracic Surgery, Department of Surgery, Tri-Service General Hospital, National Defense Medical Center, Taipei, Taiwan</p> <p>Tsao, Chang-Huei; Department of Microbiology &amp; Immunology, National Defense Medical Center, Taipei, Taiwan, Department of Microbiology &amp; Immunology, National Defense Medical Center, Taipei, Taiwan</p> <p>Chang, Shan-Yueh; Division of Pulmonary and Critical Care, Department of Internal Medicine, National Defense Medical Center Tri-Service General Hospital, Taipei, Taiwan, Division of Pulmonary and Critical Care, Department of Internal Medicine, National Defense Medical Center Tri-Service General Hospital, Taipei, Taiwan</p> <p>Peng, Chung-Kan; Division of Pulmonary and Critical Care, Department of Internal Medicine, National Defense Medical Center Tri-Service General Hospital, Taipei, Taiwan, Division of Pulmonary and Critical Care, Department of Internal Medicine, National Defense Medical Center Tri-Service General Hospital, Taipei, Taiwan</p> <p>Cheng, Wei-Erh; Division of Chest Medicine, Department of Internal Medicine, Fu Jen Catholic University Hospital, New Taipei City, Taiwan, Division of Chest Medicine, Department of Internal Medicine, Fu Jen Catholic University Hospital, New Taipei City, Taiwan; School of Medicine, College of Medicine, Fu Jen Catholic University, New Taipei City, Taiwan, School of Medicine, College of Medicine, Fu Jen Catholic University, New Taipei City, Taiwan</p> <p>Chien, Wu-Chien; School of Public Health, National Defense Medical Center, Taipei, Taiwan, School of Public Health, National Defense Medical Center, Taipei, Taiwan</p> <p>Shen, Chih-Hao; Division of Pulmonary and Critical Care, Department of Internal Medicine, National Defense Medical Center Tri-Service General Hospital, Taipei, Taiwan, Division of Pulmonary and Critical Care, Department of Internal Medicine, National Defense Medical Center Tri-Service General Hospital, Taipei, Taiwan</p> |
| <b>Primary Subject            | Public health                                                                                                                                                                                                                                                                                                                                                                                                                                                                                                                                                                                                                                                                                                                                                                                                                                                                                                                                                                                                                                                                                                                                                                                                                                                                                                                                                                                                                                                                                                                                                                                                                                                                                                                                                                                                                                                                                                                                                                                                                                                                                                                                                                                                                                                                                                                                                                                                                                                                                                                                                                                                                                                                                                                                                                                                                                    |

1  
2  
3  
4  
5  
6  
7  
8  
9  
10  
11  
12  
13  
14  
15  
16  
17  
18  
19  
20  
21  
22  
23  
24  
25  
26  
27  
28  
29  
30  
31  
32  
33  
34  
35  
36  
37  
38  
39  
40  
41  
42  
43  
44  
45  
46  
47  
48  
49  
50  
51  
52  
53  
54  
55  
56  
57  
58  
59  
60

|                            |                                                                                                                                                                                                       |
|----------------------------|-------------------------------------------------------------------------------------------------------------------------------------------------------------------------------------------------------|
| Heading                    |                                                                                                                                                                                                       |
| Secondary Subject Heading: | Health policy, Surgery, Epidemiology                                                                                                                                                                  |
| Keywords:                  | PUBLIC HEALTH, Spine < ORTHOPAEDIC & TRAUMA SURGERY, Bone diseases < ORTHOPAEDIC & TRAUMA SURGERY, Musculoskeletal disorders < ORTHOPAEDIC & TRAUMA SURGERY, Scoliosis < ORTHOPAEDIC & TRAUMA SURGERY |
|                            |                                                                                                                                                                                                       |

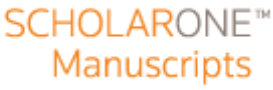

1  
2  
3  
4 **Association between Spinal Curvature Disorders and Injury: A**  
5  
6 **Nationwide Population-based Retrospective Cohort Study**  
7  
8  
9

10  
11  
12 Yen-Liang Kuo<sup>1,2,3</sup>, Chi-Hsiang Chung<sup>4,5</sup>, Tsai-Wang Huang<sup>6</sup>, Chang-Huei Tsao<sup>7,8</sup>,

13  
14  
15 Shan-Yueh Chang<sup>3</sup>, Chung-Kan Peng<sup>3</sup>, Wei-Erh Cheng<sup>1,2</sup>, Wu-Chien Chien<sup>5,8\*</sup>,

16  
17  
18 Chih-Hao Shen<sup>3\*</sup>  
19

20  
21 <sup>1</sup> Division of Chest Medicine, Department of Internal Medicine, Fu Jen Catholic  
22  
23 University Hospital, New Taipei City, Taiwan  
24

25  
26 <sup>2</sup> School of Medicine, College of Medicine, Fu Jen Catholic University, New Taipei  
27  
28 City, Taiwan  
29

30  
31 <sup>3</sup> Division of Pulmonary and Critical Care, Department of Internal Medicine, National  
32  
33 Defense Medical Center Tri-Service General Hospital, Taipei, Taiwan  
34

35  
36  
37 <sup>4</sup> Taiwanese Injury Prevention and Safety Promotion Association, Taipei, Taiwan  
38

39  
40  
41 <sup>5</sup> School of Public Health, National Defense Medical Center, Taipei, Taiwan  
42

43  
44  
45 <sup>6</sup> Division of Thoracic Surgery, Department of Surgery, Tri-Service General Hospital,  
46  
47 National Defense Medical Center, Taipei, Taiwan  
48

49  
50  
51 <sup>7</sup> Department of Microbiology & Immunology, National Defense Medical Center,  
52  
53 Taipei, Taiwan  
54

55  
56  
57 <sup>8</sup> Department of Medical Research, Tri-Service General Hospital and National  
58

1  
2  
3  
4 Defense Medical Center, Taipei, Taiwan  
5

6 \*These authors contributed equally to this work  
7  
8  
9  
10

11  
12 **Corresponding author:**  
13

14 Chih-Hao Shen;  
15

16 Address: Division of Pulmonary and Critical Care, Department of Internal Medicine,  
17

18 Tri-Service General Hospital, National Defense Medical Center, No.325, Section 2,  
19

20 Cheng-Kung Road, Neihu District, Taipei, 11490, Taiwan;  
21

22 Tel: 886-2- 87923311, Ext. 16883  
23

24 Fax: 886-2- 66008692;  
25

26 E-mail: Potato652@yahoo.com.tw  
27  
28  
29  
30

31 **Word count:** 2,412  
32  
33  
34  
35  
36  
37  
38  
39  
40  
41  
42  
43  
44  
45  
46  
47  
48  
49  
50  
51  
52  
53  
54  
55  
56  
57  
58  
59  
60

## Abstract

**Objectives:** Injury is an important issue in public health. Spinal curvature disorders are deformities characterized by excessive curves of the spine. The prevalence of spinal curvature disorders is not low, but its relationship with injury has not been studied. The aim of this study is to investigate whether spinal curvature disorders increases the risk of injury.

**Design:** Population-based retrospective cohort study.

**Setting:** Using data from the Taiwan National Health Insurance Research Database (NHIRD) from 2000 to 2010.

**Participants and exposure:** Patients with spinal curvature disorders were selected using codes from the International Classification of Diseases, Ninth Revision, Clinical Modification (ICD-9-CM). A cohort without spinal curvature was randomly frequency-matched to the spinal curvature disorders cohort at a ratio of 2:1 according to age, sex, and index year.

**Primary outcome measures:** The risk of injury was analyzed using Cox's proportional hazards regression models adjusting for age, sex, comorbidities, urbanization level, and socioeconomic status.

**Results:** A total of 20,566 patients with spinal curvature disorders and 41,132 controls were enrolled in this study. The risk of injury was 2.209 times higher (95%



1  
2  
3  
4 CI 2.118 to 2.303) in patients with spinal curvature disorders than in the control group.

5  
6 The spinal curvature disorders cohort exhibited higher risk of developing injury  
7  
8 compared to the control group, regardless of age, sex, comorbidities, urbanization  
9  
10 level, and subgroup of spinal curvature disorders. Based on the subgroup analysis, the  
11  
12 spinal curvature disorders cohort had higher risks of unintentional injury and injury  
13  
14 diagnoses such as fracture, dislocation, open wound, superficial injury/contusion,  
15  
16 crushing, and injury to nerves and spinal cord compared to the control cohort.  
17  
18  
19  
20  
21

22  
23 **Conclusions:** Patients with spinal curvature disorders have a significantly higher risk  
24  
25 of developing injury than patients without spinal curvature disorders. Aggressive  
26  
27 detection and management of spinal curvature disorders may be beneficial for injury  
28  
29 prevention.  
30  
31  
32  
33

34  
35  
36  
37 **Short title:** Relationship between spinal curvature disorders and injury  
38  
39  
40  
41  
42

43 **Keywords:** injury, spinal curvature disorders, spinal curvature, kyphosis, lordosis,  
44  
45 scoliosis, risk factor  
46  
47  
48  
49  
50

#### 51 **Conflicts of interest**

52  
53  
54 The authors declare that they have no conflict of interest.  
55  
56

### **Author Contributions:**

Yen-Liang Kuo, Chih-Hao Shen and Wu-Chien Chien led the project and interpreted the data. Chi-Hsiang Chung, Tsai-Wang Huang and Chang-Huei Tsao conducted this study and analyzed the data. Shan-Yueh Chang, Chung-Kan Peng and Wei-Erh Cheng interpreted the data. Yen-Liang Kuo, Chih-Hao Shen and Wu-Chien Chien wrote the paper. All authors approved the final version of manuscript.

### **Strengths and limitations of this study:**

- This is the first nationwide population-based cohort study to assess the associations between spinal curvature and injury.
- The main strengths of this study are the large population-based dataset and the retrospective cohort design, which minimize selection bias.
- This study cohort is large enough to examine each risks of injury among subgroups.
- The limitation of this study is the lack of information on the severity of spinal curvature disorders, detailed patient characteristics, and injury severity.

### **Ethics**

Because data were collected from the Taiwan National Health Insurance Research Database and 1,000,000 people were randomly selected from the entire population, personal medical information about an identifiable person is not contained in this

1  
2  
3  
4 database and patient consent was not necessary. This study was approved after a  
5  
6 complete ethical review by the Institutional Review Board (IRB) of National Defense  
7  
8  
9 Medical Center Tri-Service General Hospital (approval number: TSGHIRB No.  
10  
11  
12 1-105-05-142).  
13  
14  
15  
16  
17

### 18 **Funding statement**

19  
20 There is no funding for this submission.  
21  
22  
23  
24  
25

### 26 **Data sharing statement**

27  
28  
29 No additional data available.  
30  
31  
32  
33  
34  
35  
36  
37  
38  
39  
40  
41  
42  
43  
44  
45  
46  
47  
48  
49  
50  
51  
52  
53  
54  
55  
56  
57  
58  
59  
60

## Introduction

The spine has a gentle curve when viewed from the side and a straight appearance when viewed from the back. This structure absorbs the stress from body movement and gravity. Kyphosis is a convex curvature of the spine that creates a hunchback appearance. Lordosis refers to the inward concave curving of the cervical and lumbar regions of the spine<sup>1 2</sup>. When disorders of the spine occur, the natural curvatures of the spine are misaligned or exaggerated in certain areas.

Possible spinal curvature disorders include scoliosis, hyperkyphosis, and hyperlordosis, which can be graded in severity by the Cobb angle<sup>3</sup>. Scoliosis indicates a lateral displacement or curvature of the spine<sup>4</sup>, which is defined by a curve in the spine with a Cobb angle of 10 degrees or greater in adults<sup>5</sup>. Hyperkyphosis and hyperlordosis are commonly referred to as kyphosis and lordosis by the medical community. The evaluation of these conditions is challenging due to the lack of standardized diagnostic criteria. Generally, the Cobb angle of a normal thoracic spine ranges between 20 and 50 degrees in young people<sup>1 6</sup>.

Among community-dwelling individuals  $\geq 60$  years old, the current incidence of hyperkyphosis is between 20 and 40 percent<sup>7-9</sup>. There are multiple contributing factors to spinal curvature disorders, such as vertebral fractures with low bone density<sup>10-12</sup>, short vertebral height as in Scheuermann disease<sup>13</sup>, degenerative disc disease<sup>14</sup>,

1  
2  
3 postural changes<sup>15-18</sup>, muscle weakness<sup>15 19-23</sup>, intervertebral ligament degeneration<sup>24</sup>,  
4  
5  
6 and systemic physical activity practice<sup>25-28</sup>.  
7

8  
9 Injury is an important issue in public health<sup>29</sup>, especially among the elderly<sup>30</sup>.

10  
11 Injuries can be divided into several types according to various factors, such as injury  
12  
13 diagnosis, cause of injury, or intentionality of injury according to the National Health  
14  
15 Insurance Research Database (NHIRD) of Taiwan<sup>31</sup>. The occurrence of injury  
16  
17 influences the capacity for activity and can cause complications, economic burden,  
18  
19 and even mortality<sup>32-35</sup>. Thus, determining the modifiable risks and strategies for the  
20  
21 prevention or management of injury deserves more clinical attention.  
22  
23  
24  
25  
26  
27

28  
29 The potential relationship between spinal curvature disorders and injury is not  
30  
31 precisely known. Sinaki et al. demonstrated that thoracic hyperkyphosis in the context  
32  
33 of reduced muscle strength plays an important role in increasing body sway, gait  
34  
35 unsteadiness, and risk of falls in osteoporosis<sup>23</sup>. De Groot et al. suggest that patients  
36  
37 with flexed posture (characterized by protrusion of the head and increased thoracic  
38  
39 kyphosis) have impaired postural control during walking and may therefore have  
40  
41 higher risk of falling<sup>36</sup>. However, no study has described the sequential association  
42  
43 between spine curvature disorders and injury. We conducted a nationwide  
44  
45 population-based cohort study to investigate whether spinal curvature disorders  
46  
47 increases the risk of injury.  
48  
49  
50  
51  
52  
53  
54  
55  
56

## Materials and Methods

### Data sources

Taiwan's NHIRD has been built since Taiwan established a universal health care system in 1995. This database includes the medical records of the Taiwanese population of around 23.81 million, and the coverage reached 99.6% in 2016. In this study, data were collected from the NHIRD, and 1,000,000 people were randomly and anonymously selected from the entire population. The disease diagnosis codes in the NHIRD dossier are based on the International Classification of Diseases, Ninth Revision, Clinical Modification (ICD-9-CM)<sup>37</sup>. This study was approved after a complete ethical review by the Institutional Review Board (IRB) of National Defense Medical Center Tri-Service General Hospital (approval number: TSGHIRB No. 1-105-05-142) and the informed consent was not necessary.

### Study design and sampled participants

This study was a retrospective cohort design. Patients were selected if they were diagnosed with spinal curvature disorders with  $\geq 3$  outpatient visits and spinal curvature disorders inpatients from January 2, 2000, to December 31, 2010, according to the following ICD-9 codes: kyphosis (ICD-9-CM 737.0, 737.1, 737.41), lordosis (ICD-9-CM 737.2, 737.42), kyphoscoliosis and scoliosis (ICD-9-CM 737.3, 737.43),

1  
2  
3  
4 and unspecified (ICD-9-CM 737.40, 737.8, 737.9) from the Longitudinal Health  
5  
6 Insurance Database (LHID). Patients were excluded for the following reasons: 1)  
7  
8 spinal curvature disorders diagnosed before 2000, 2) injury before tracing, 3) age < 20  
9  
10 years, and 4) unknown gender. The patients were divided into four groups based on  
11  
12 the ICD codes.  
13  
14  
15

16  
17  
18 For the control cohort, we randomly selected patients without spinal curvature  
19  
20 disorders in this period from among insured individuals. We excluded control subjects  
21  
22 according to the same criteria. The spinal curvature disorders cohort and control  
23  
24 cohort were frequency matched by gender, age, and index rate (Figure 1).  
25  
26  
27

### 28 29 **Patient and public involvement**

30  
31 This retrospective cohort study used Taiwan National Health Insurance Research  
32  
33 Database with anonymized identifications. Therefore, patients and public were not  
34  
35 involved.  
36  
37  
38

### 39 40 **Outcome measures**

41  
42  
43 All study participants were followed from the index date until the first diagnosis of  
44  
45 injury (ICD-9-CM 800–999), withdrawal from the National Health Insurance (NHI)  
46  
47 program, or the end of 2010. Based on the definition of injury categories from prior  
48  
49 studies<sup>31 38</sup>, the causes of injury were classified as traffic injuries (ICD-9-CM  
50  
51 E800-E849), poisoning (ICD-9-CM E850-E869), falls (ICD-9-CM E880-E888),  
52  
53  
54  
55  
56

1  
2  
3  
4 burns and fires (ICD-9-CM E890-E899), drowning (ICD-9-CM E910), suffocation  
5  
6 (ICD-9-CM E911-E915), crushing/cutting/piercing (ICD-9-CM E916-E920), other  
7  
8 unintentional injuries (ICD-9-CM E870-E879, E900-E909, E951-E949). The  
9  
10  
11  
12 intentionality categories of injuries include unintentional (ICD-8-CM E800-R949),  
13  
14  
15 intentional (ICD-9-CM E950-E979, E990-E999), and unknown.  
16

### 17 **Comorbidities**

18  
19  
20 Baseline comorbidities include diabetes (ICD-9-CM 250), hypertension  
21  
22 (ICD-9-CM 401 – 405), ischemic heart disease (ICD-9-CM codes 410–414), stroke  
23  
24 (ICD-9-CM 430-438), chronic kidney disease (ICD-9-CM 585), liver cirrhosis  
25  
26 (ICD-9-CM 570, 571, 572.1, 572.4, 573.1–573.3), chronic obstructive lung disease  
27  
28 (ICD-9-CM codes 490, 491, 495, and 496), and cancer (ICD-9-CM 140-208). The  
29  
30  
31  
32  
33  
34  
35  
36  
37  
38  
39  
40  
41  
42  
43  
44  
45  
46  
47  
48  
49  
50  
51  
52  
53  
54  
55  
56  
57  
58  
59  
60  
61  
62  
63  
64  
65  
66  
67  
68  
69  
70  
71  
72  
73  
74  
75  
76  
77  
78  
79  
80  
81  
82  
83  
84  
85  
86  
87  
88  
89  
90  
91  
92  
93  
94  
95  
96  
97  
98  
99  
100  
101  
102  
103  
104  
105  
106  
107  
108  
109  
110  
111  
112  
113  
114  
115  
116  
117  
118  
119  
120  
121  
122  
123  
124  
125  
126  
127  
128  
129  
130  
131  
132  
133  
134  
135  
136  
137  
138  
139  
140  
141  
142  
143  
144  
145  
146  
147  
148  
149  
150  
151  
152  
153  
154  
155  
156  
157  
158  
159  
160  
161  
162  
163  
164  
165  
166  
167  
168  
169  
170  
171  
172  
173  
174  
175  
176  
177  
178  
179  
180  
181  
182  
183  
184  
185  
186  
187  
188  
189  
190  
191  
192  
193  
194  
195  
196  
197  
198  
199  
200  
201  
202  
203  
204  
205  
206  
207  
208  
209  
210  
211  
212  
213  
214  
215  
216  
217  
218  
219  
220  
221  
222  
223  
224  
225  
226  
227  
228  
229  
230  
231  
232  
233  
234  
235  
236  
237  
238  
239  
240  
241  
242  
243  
244  
245  
246  
247  
248  
249  
250  
251  
252  
253  
254  
255  
256  
257  
258  
259  
260  
261  
262  
263  
264  
265  
266  
267  
268  
269  
270  
271  
272  
273  
274  
275  
276  
277  
278  
279  
280  
281  
282  
283  
284  
285  
286  
287  
288  
289  
290  
291  
292  
293  
294  
295  
296  
297  
298  
299  
300  
301  
302  
303  
304  
305  
306  
307  
308  
309  
310  
311  
312  
313  
314  
315  
316  
317  
318  
319  
320  
321  
322  
323  
324  
325  
326  
327  
328  
329  
330  
331  
332  
333  
334  
335  
336  
337  
338  
339  
340  
341  
342  
343  
344  
345  
346  
347  
348  
349  
350  
351  
352  
353  
354  
355  
356  
357  
358  
359  
360  
361  
362  
363  
364  
365  
366  
367  
368  
369  
370  
371  
372  
373  
374  
375  
376  
377  
378  
379  
380  
381  
382  
383  
384  
385  
386  
387  
388  
389  
390  
391  
392  
393  
394  
395  
396  
397  
398  
399  
400  
401  
402  
403  
404  
405  
406  
407  
408  
409  
410  
411  
412  
413  
414  
415  
416  
417  
418  
419  
420  
421  
422  
423  
424  
425  
426  
427  
428  
429  
430  
431  
432  
433  
434  
435  
436  
437  
438  
439  
440  
441  
442  
443  
444  
445  
446  
447  
448  
449  
450  
451  
452  
453  
454  
455  
456  
457  
458  
459  
460  
461  
462  
463  
464  
465  
466  
467  
468  
469  
470  
471  
472  
473  
474  
475  
476  
477  
478  
479  
480  
481  
482  
483  
484  
485  
486  
487  
488  
489  
490  
491  
492  
493  
494  
495  
496  
497  
498  
499  
500  
501  
502  
503  
504  
505  
506  
507  
508  
509  
510  
511  
512  
513  
514  
515  
516  
517  
518  
519  
520  
521  
522  
523  
524  
525  
526  
527  
528  
529  
530  
531  
532  
533  
534  
535  
536  
537  
538  
539  
540  
541  
542  
543  
544  
545  
546  
547  
548  
549  
550  
551  
552  
553  
554  
555  
556  
557  
558  
559  
560  
561  
562  
563  
564  
565  
566  
567  
568  
569  
570  
571  
572  
573  
574  
575  
576  
577  
578  
579  
580  
581  
582  
583  
584  
585  
586  
587  
588  
589  
590  
591  
592  
593  
594  
595  
596  
597  
598  
599  
600  
601  
602  
603  
604  
605  
606  
607  
608  
609  
610  
611  
612  
613  
614  
615  
616  
617  
618  
619  
620  
621  
622  
623  
624  
625  
626  
627  
628  
629  
630  
631  
632  
633  
634  
635  
636  
637  
638  
639  
640  
641  
642  
643  
644  
645  
646  
647  
648  
649  
650  
651  
652  
653  
654  
655  
656  
657  
658  
659  
660  
661  
662  
663  
664  
665  
666  
667  
668  
669  
670  
671  
672  
673  
674  
675  
676  
677  
678  
679  
680  
681  
682  
683  
684  
685  
686  
687  
688  
689  
690  
691  
692  
693  
694  
695  
696  
697  
698  
699  
700  
701  
702  
703  
704  
705  
706  
707  
708  
709  
710  
711  
712  
713  
714  
715  
716  
717  
718  
719  
720  
721  
722  
723  
724  
725  
726  
727  
728  
729  
730  
731  
732  
733  
734  
735  
736  
737  
738  
739  
740  
741  
742  
743  
744  
745  
746  
747  
748  
749  
750  
751  
752  
753  
754  
755  
756  
757  
758  
759  
760  
761  
762  
763  
764  
765  
766  
767  
768  
769  
770  
771  
772  
773  
774  
775  
776  
777  
778  
779  
780  
781  
782  
783  
784  
785  
786  
787  
788  
789  
790  
791  
792  
793  
794  
795  
796  
797  
798  
799  
800  
801  
802  
803  
804  
805  
806  
807  
808  
809  
810  
811  
812  
813  
814  
815  
816  
817  
818  
819  
820  
821  
822  
823  
824  
825  
826  
827  
828  
829  
830  
831  
832  
833  
834  
835  
836  
837  
838  
839  
840  
841  
842  
843  
844  
845  
846  
847  
848  
849  
850  
851  
852  
853  
854  
855  
856  
857  
858  
859  
860  
861  
862  
863  
864  
865  
866  
867  
868  
869  
870  
871  
872  
873  
874  
875  
876  
877  
878  
879  
880  
881  
882  
883  
884  
885  
886  
887  
888  
889  
890  
891  
892  
893  
894  
895  
896  
897  
898  
899  
900  
901  
902  
903  
904  
905  
906  
907  
908  
909  
910  
911  
912  
913  
914  
915  
916  
917  
918  
919  
920  
921  
922  
923  
924  
925  
926  
927  
928  
929  
930  
931  
932  
933  
934  
935  
936  
937  
938  
939  
940  
941  
942  
943  
944  
945  
946  
947  
948  
949  
950  
951  
952  
953  
954  
955  
956  
957  
958  
959  
960  
961  
962  
963  
964  
965  
966  
967  
968  
969  
970  
971  
972  
973  
974  
975  
976  
977  
978  
979  
980  
981  
982  
983  
984  
985  
986  
987  
988  
989  
990  
991  
992  
993  
994  
995  
996  
997  
998  
999  
1000

### 40 **Statistical analysis**

41  
42  
43 All analyses were performed using the Statistical Package for the Social Sciences  
44  
45 (SPSS) (V.21; SPSS Inc., Chicago, Illinois, USA). Chi squared and t tests were used  
46  
47  
48  
49 to evaluate the distributions of categorical and continuous variables between patients  
50  
51  
52 with spinal curvature disorders and the control group. The incidence rates of injury  
53  
54  
55 were calculated according to gender, age, number of comorbidities, urbanization level,  
56  
57  
58  
59  
60



1  
2  
3 and insurance premium. Multivariable Cox proportional hazards regression models  
4  
5  
6 were used to determine the risk of injury, which is presented as a hazard ratio (HR)  
7  
8  
9 with a 95% confidence interval (CI). The difference in injury risk between the two  
10  
11  
12 groups was estimated using the Kaplan-Meier method with the log-rank test. A  
13  
14  
15 two-tailed p value < 0.05 was considered significant.  
16  
17  
18  
19

## 20 21 **Results**

22  
23 We enrolled 20,566 patients who had spinal curvature disorders and 41,132  
24  
25  
26 subjects without spinal curvature disorders in the control group. The majority of  
27  
28  
29 patients were  $\geq 65$  years old (52.82% and 51.58% for spinal curvature disorders and  
30  
31  
32 control group, respectively). Females accounted for more than half of the subjects  
33  
34  
35 (64.61%) in each cohort. There is a significant difference in the number of  
36  
37  
38 comorbidities, urbanization level, and insurance premium between the spinal  
39  
40  
41 curvature group and control group (Table 1). The average period of follow-up was  
42  
43  
44 5.48 years for the spinal curvature disorders cohort and 6.24 years for the control  
45  
46  
47 group.  
48

49 Table 2 shows that the incidence of injury was higher in the spinal curvature  
50  
51  
52 disorders cohort than that in the control cohort (10905.25 and 9059.47 incidences per  
53  
54  
55 100,000 person-years, respectively). Compared to the control group, spinal curvature  
56  
57  
58  
59  
60

1  
2  
3  
4 disorders patients were associated with a significantly higher risk of injury (adjusted  
5  
6 HR 2.209 (95% CI 2.118 to 2.303)). The spinal curvature disorders cohort exhibited a  
7  
8 higher risk of injury compared to the control group, regardless of age, sex,  
9  
10 comorbidities, and urbanization level. The risk of injury was also significantly higher  
11  
12 in the spinal curvature disorders cohort than in the control cohort among patients with  
13  
14 insurance premiums < 18,000 New Taiwan dollars (NTD) and 18,000-34,999 NTD.  
15  
16 Table 3 shows the risks of injury stratified by subgroup of spinal curvature disorders  
17  
18 (kyphosis, lordosis, kyphoscoliosis and scoliosis, and unspecified type). All  
19  
20 subgroups of spinal curvature disorders had a significantly higher risk of injury  
21  
22 compared to the control cohort (adjusted HR 2.777 (95% CI 2.553 to 3.021), 2.087  
23  
24 (95% CI 1.235 to 3.527), 2.113 (95% CI 2.021 to 2.210), 2.727 (95% CI 2.119 to  
25  
26 3.509), respectively).

27  
28  
29  
30  
31  
32  
33  
34  
35  
36  
37 Table 4 shows the incidence and adjusted HR of injury according to the injury  
38  
39 diagnosis, cause of injury, and intentionality of injury at the end of the follow-up  
40  
41 period. The spinal curvature disorders cohort had a significantly higher risk of  
42  
43 unintentionality of injury compared to the control cohort (adjusted HR 1.537 (95% CI  
44  
45 1.200 to 2.605)). The spinal curvature disorders cohort had significantly higher risk in  
46  
47 injury diagnoses of fracture, dislocation, open wound, superficial injury/contusion,  
48  
49 crushing, injury to nerve and spinal cord, and other injury compared to the control  
50  
51  
52  
53  
54  
55  
56

1  
2  
3 cohort (adjusted HR 1.502 (95% CI 1.398 to 1.614), 1.732 (95% CI 1.172 to 2.558),  
4  
5  
6 1.597 (95% CI 1.310 to 1.939), 1.414 (95% CI 1.131 to 1.761), 4.949 (95% CI 1.093  
7  
8 to 30.895), 2.428 (95% CI 1.310 to 4.500), and 1.387 (95% CI 1.284 to 1.499),  
9  
10  
11 respectively). They also had significantly higher risk of traffic injuries, falls,  
12  
13 suffocation, crushing/cutting/piercing, and other injuries compared to the control  
14  
15 cohort (adjusted HR 1.379 (95% CI 1.191 to 1.597), 1.552 (95% CI 1.429 to 1.686),  
16  
17 6.442 (95% CI 2.335 to 17.776), 2.595 (95% CI 1.056 to 3.409), and 1.612 (95% CI  
18  
19 1.443 to 1.800), respectively). Significantly higher risk of unintentional injury was  
20  
21 also observed in the spinal curvature disorders cohort (1.537 (95% CI 1.200 to  
22  
23 2.605)).

24  
25  
26 We used Kaplan-Meier survival analysis to assess the cumulative incidence. The  
27  
28 injury rates of spinal curvature disorders subjects (17.59 %, in 20,566) and non-spinal  
29  
30 curvature disorders control (15.20%, in 41,132), and in two-tailed test, while setting  
31  
32 the significance as  $p < 0.05$ , the estimated statistical power for this study is 0.999.  
33  
34  
35 There were significant differences in the cumulative incidence of injury among the  
36  
37 patients with and without spinal curvature disorders from the 1st to the 11th follow-up  
38  
39 year (log-rank test;  $p < 0.001$ ) (Figure 2).  
40  
41  
42  
43  
44  
45  
46  
47  
48  
49  
50  
51  
52  
53

## 54 Discussion

1  
2  
3  
4 This is the first nationwide population-based cohort study to investigate the  
5  
6 associations between spinal curvature disorders and injury. We found that patients  
7  
8 with spinal curvature disorders had 2.209-times higher risk of developing injury  
9  
10 compared to those without spinal curvature disorders. Although the spinal curvature  
11  
12 disorders and non-spinal curvature disorders cohorts had different prevalence of  
13  
14 comorbidities, urbanization level, and insurance premium on the index day, spinal  
15  
16 curvature disorders remained an independent risk factor for injury in the adjusted Cox  
17  
18 regression analysis. As shown in Table 2, patients in the spinal curvature disorders  
19  
20 cohort had a higher incidence of injury than patients in the control cohort in most of  
21  
22 the subgroup analyses of sex, age, comorbidity, urbanization level and socioeconomic  
23  
24 status. This observation strengthens the finding that spinal curvature disorders  
25  
26 independently increases the risk of injury.  
27  
28  
29  
30  
31  
32  
33  
34  
35

36  
37 For subgroup analysis of injury events, we found that patients with spinal curvature  
38  
39 disorders had higher risk of unintentional injury and injury diagnoses such as fracture,  
40  
41 dislocation, open wound, superficial injury/contusion, crushing, and injury to nerves  
42  
43 and spinal cord. The severity of spinal curvature disorders is defined by the  
44  
45 measurement of the Cobb angle of curvature<sup>3</sup>. Chest wall compliance decreases in  
46  
47 severe cases, which leads to difficulty in breathing, increased risk of respiratory  
48  
49 muscle fatigue<sup>39 40</sup>, increased dead space fraction, alveolar hypoventilation with  
50  
51  
52  
53  
54  
55  
56  
57  
58  
59  
60

1  
2  
3 hypercapnia<sup>41</sup>, hypoxemia<sup>42</sup>, ventilation-perfusion mismatch, apneic events with  
4  
5  
6 nocturnal hypoventilation and arterial oxygen desaturation<sup>39 43</sup>, and exercise  
7  
8  
9 limitations<sup>44 45</sup>. Previous studies also suggest that spinal curvature disorders is  
10  
11  
12 associated with reduced muscle strength, increased body sway, and gait unsteadiness  
13  
14  
15<sup>23 46-48</sup>. The increased risk of unintentional injury in our study may be explained by  
16  
17  
18 these systemic manifestations of spinal curvature disorders.  
19

20  
21 We found that patients with spinal curvature disorders had higher risks of various  
22  
23 injury causes, such as traffic injuries, falls, suffocation, crushing/cutting/piercing, and  
24  
25 other unintentional injuries. Among these causes, risk of suffocation (adjusted HR  
26  
27 6.442) was much higher than that of other injuries. Although respiratory muscle  
28  
29 fatigue<sup>15 16</sup> and lung function impairment were found in patients with spinal  
30  
31 curvature<sup>17</sup>, there are insufficient studies explaining the mechanism between spinal  
32  
33  
34 curvature disorders and suffocation. Further studies for analyzing this correlation are  
35  
36  
37 warranted.  
38  
39  
40  
41  
42

43  
44 After stratifying patients with injury by age, we found that the adjusted HR of  
45  
46 subjects aged 20 to 40 years and 41 to 64 years were much higher than in those aged  
47  
48 65 years and above (adjusted HR: 6.665, 6.154, and 1.666, respectively). This  
49  
50  
51 contrasts with the concept that risk of injury is higher among the elderly, especially  
52  
53  
54 for fracture due to car crashes<sup>49</sup>. The actual mechanisms remain unknown for this  
55  
56  
57

1  
2  
3  
4 phenomenon. We found that older patients with spinal curvature disorders had more  
5  
6 comorbidities than younger patients with these disorders (Table 2). Previous studies  
7  
8 showed that age and chronic illness are associated with disability in daily living  
9  
10 activities<sup>50 51</sup>. Therefore, older patients with spinal curvature disorders may present  
11  
12 less activity. On the other hand, previous studies also demonstrated that impaired  
13  
14 balance control<sup>52</sup> and changes in the capacity of maintaining position<sup>53</sup> can be found  
15  
16 in young scoliosis patients. It is possible that daily activities may be less limited in  
17  
18 younger populations with spinal curvature disorders, which increases the risk of injury.  
19  
20  
21  
22  
23  
24  
25  
26 Future studies on this correlation are warranted.

27  
28  
29 The treatment of spinal curvature disorders includes supportive care, bracing,  
30  
31 pulmonary rehabilitation, noninvasive ventilation, and surgery<sup>54-58</sup>. Treatment may  
32  
33 also improve pulmonary function, exercise capacity, and arterial blood gas, as well as  
34  
35 eliminate obstructive apnea<sup>59</sup>. We found spinal curvature disorders were associated  
36  
37 with higher risk of injury. However, whether providing assistive devices or protective  
38  
39 gear to patients with spinal curvature disorders decreases the incidence of injury  
40  
41  
42  
43  
44  
45  
46 remains uncertain. Future studies focusing on the association between early detection,  
47  
48  
49 adequate treatment of spinal curvature disorders, and the prevention of injury are  
50  
51  
52 warranted.

53  
54 This study has some limitations. Firstly, the severity of spinal curvature  
55  
56

1  
2  
3  
4 disorders, the subjective symptoms and physical examinations were not recorded  
5  
6 which might confound the incidence rate of spinal curvature disorders. Secondly,  
7  
8 there is no information on patient characteristics from the NHIRD. The data lacked  
9  
10 information about smoking, dietary habits, alcoholism, substance use, obesity and  
11  
12 bone mineral density, which might influence the time and incidence rate of injury  
13  
14 occurrence. Thirdly, the severity of injuries that would impact the patient's daily life  
15  
16 was not evaluated. Fourthly, other bias might remain in this retrospective cohort study,  
17  
18 despite the meticulous adjustment of the model for potential confounders.  
19  
20  
21  
22  
23  
24

25  
26 In conclusion, our study suggests that patient with spinal curvature disorders  
27  
28 exhibit higher risk of developing injury than patients without spinal curvature  
29  
30 disorders, especially the risks of unintentional injury and injury diagnoses such as  
31  
32 fracture, dislocation, open wound, superficial injury/contusion, crushing, and injury to  
33  
34 nerves and spinal cord. Aggressive detection and management of patients with spinal  
35  
36 curvature disorders may be beneficial for injury prevention from a public health  
37  
38 perspective.  
39  
40  
41  
42  
43  
44  
45  
46  
47  
48

## 49 Reference

- 50  
51 1. Fon GT, Pitt MJ, Thies AC, Jr. Thoracic kyphosis: range in normal subjects. *AJR Am J*  
52 *Roentgenol* 1980;134(5):979-83. doi: 10.2214/ajr.134.5.979  
53  
54 2. Voutsinas SA, MacEwen GD. Sagittal profiles of the spine. *Clin Orthop Relat Res*  
55 1986(210):235-42.  
56

- 1
- 2
- 3 3. J. C. Outline for the study of scoliosis. *Amer Acad Orthop Surg Instructional Course*
- 4 *Lectures* 1948;5:261–75.
- 5
- 6 4. Vasiliadis ES, Grivas TB, Kaspiris A. Historical overview of spinal deformities in
- 7 ancient Greece. *Scoliosis* 2009;4:6. doi: 10.1186/1748-7161-4-6
- 8
- 9 5. Kane WJ. Scoliosis prevalence: a call for a statement of terms. *Clin Orthop Relat Res*
- 10 1977(126):43-6.
- 11
- 12 6. Boseker EH, Moe JH, Winter RB, et al. Determination of "normal" thoracic
- 13 kyphosis: a roentgenographic study of 121 "normal" children. *J Pediatr Orthop*
- 14 2000;20(6):796-8.
- 15
- 16 7. Kado DM, Huang MH, Karlamangla AS, et al. Hyperkyphotic posture predicts
- 17 mortality in older community-dwelling men and women: a prospective study.
- 18 *J Am Geriatr Soc* 2004;52(10):1662-7. doi: 10.1111/j.1532-5415.2004.52458.x
- 19
- 20 8. Ryan SD, Fried LP. The impact of kyphosis on daily functioning. *J Am Geriatr Soc*
- 21 1997;45(12):1479-86.
- 22
- 23 9. Takahashi T, Ishida K, Hirose D, et al. Trunk deformity is associated with a reduction
- 24 in outdoor activities of daily living and life satisfaction in community-dwelling
- 25 older people. *Osteoporos Int* 2005;16(3):273-9. doi:
- 26 10.1007/s00198-004-1669-3
- 27
- 28 10. Ensrud KE, Black DM, Harris F, et al. Correlates of kyphosis in older women. The
- 29 Fracture Intervention Trial Research Group. *J Am Geriatr Soc*
- 30 1997;45(6):682-7.
- 31
- 32 11. Kado DM, Huang MH, Karlamangla AS, et al. Factors associated with kyphosis
- 33 progression in older women: 15 years' experience in the study of osteoporotic
- 34 fractures. *J Bone Miner Res* 2013;28(1):179-87. doi: 10.1002/jbmr.1728
- 35
- 36 12. Pavlovic A, Nichols DL, Sanborn CF, et al. Relationship of thoracic kyphosis and
- 37 lumbar lordosis to bone mineral density in women. *Osteoporos Int*
- 38 2013;24(8):2269-73. doi: 10.1007/s00198-013-2296-7
- 39
- 40 13. Axenovich TI, Zaidman AM, Zorkoltseva IV, et al. Segregation analysis of
- 41 Scheuermann disease in ninety families from Siberia. *Am J Med Genet*
- 42 2001;100(4):275-9.
- 43
- 44 14. Schneider DL, von Muhlen D, Barrett-Connor E, et al. Kyphosis does not equal
- 45 vertebral fractures: the Rancho Bernardo study. *J Rheumatol*
- 46 2004;31(4):747-52.
- 47
- 48 15. Kado DM, Prenovost K, Crandall C. Narrative review: hyperkyphosis in older
- 49 persons. *Ann Intern Med* 2007;147(5):330-8.
- 50
- 51 16. Boyle JJ, Milne N, Singer KP. Influence of age on cervicothoracic spinal curvature:
- 52 an ex vivo radiographic survey. *Clin Biomech (Bristol, Avon)* 2002;17(5):361-7.
- 53
- 54 17. Vialle R, Levassor N, Rillardon L, et al. Radiographic analysis of the sagittal
- 55
- 56
- 57
- 58
- 59
- 60



- alignment and balance of the spine in asymptomatic subjects. *J Bone Joint Surg Am* 2005;87(2):260-7. doi: 10.2106/JBJS.D.02043
18. Hinman MR. Comparison of thoracic kyphosis and postural stiffness in younger and older women. *Spine J* 2004;4(4):413-7. doi: 10.1016/j.spinee.2004.01.002
19. Mika A, Unnithan VB, Mika P. Differences in thoracic kyphosis and in back muscle strength in women with bone loss due to osteoporosis. *Spine (Phila Pa 1976)* 2005;30(2):241-6.
20. Brocklehurst JC, Robertson D, James-Groom P. Skeletal deformities in the elderly and their effect on postural sway. *J Am Geriatr Soc* 1982;30(8):534-8.
21. Chow RK, Harrison JE. Relationship of kyphosis to physical fitness and bone mass on post-menopausal women. *Am J Phys Med* 1987;66(5):219-27.
22. Sinaki M, Itoi E, Rogers JW, et al. Correlation of back extensor strength with thoracic kyphosis and lumbar lordosis in estrogen-deficient women. *Am J Phys Med Rehabil* 1996;75(5):370-4.
23. Sinaki M, Brey RH, Hughes CA, et al. Balance disorder and increased risk of falls in osteoporosis and kyphosis: significance of kyphotic posture and muscle strength. *Osteoporos Int* 2005;16(8):1004-10. doi: 10.1007/s00198-004-1791-2
24. Birnbaum K, Siebert CH, Hinkelmann J, et al. Correction of kyphotic deformity before and after transection of the anterior longitudinal ligament--a cadaver study. *Arch Orthop Trauma Surg* 2001;121(3):142-7.
25. Esparza FV-C, Raquel & Alacid, Fernando & Martínez-Ruiz, E & López-Miñarro, Pedro. Sagittal spinal curvatures in maximal trunk flexion of young female dancers. *British journal of sports medicine* 2014;48.:595. doi: 10.1136/bjsports-2014-093494.95.
26. López-Miñarro PM, José & Alacid, Fernando & Manuel, Isorna & Vaquero-Cristóbal, Raquel. Sagittal spinal curvatures and pelvic inclination in kayakers. *Revista Internacional de Medicina y Ciencias de la Actividad Fisica y del Deporte* 2014;14.:633-50. .
27. Vaquero-Cristóbal RE, Francisco & Gómez-Durán, R & Martínez-Ruiz, E & Muyor, José & Alacid, Fernando & López-Miñarro, Pedro. Thoracic and lumbar morphology in standing, sitting and maximal trunk flexion with extended knees in dancers. *Archivos de Medicina del Deporte* 2015;32.:87-93.
28. López-Miñarro PA, Muyor JM. Comparison of sagittal spinal curvatures and pelvic tilt in highly trained athletes from different sport disciplines. *Kinesiology* 2017;49(1):109-16. doi: 10.26582/k.49.1.2
29. Haagsma JA, Graetz N, Bolliger I, et al. The global burden of injury: incidence, mortality, disability-adjusted life years and time trends from the Global

- 1  
2  
3 Burden of Disease study 2013. *Injury prevention : journal of the International*  
4 *Society for Child and Adolescent Injury Prevention* 2016;22(1):3-18. doi:  
5 10.1136/injuryprev-2015-041616  
6  
7 30. Yeo YY, Lee SK, Lim CY, et al. A review of elderly injuries seen in a Singapore  
8 emergency department. *Singapore Med J* 2009;50(3):278-83.  
9  
10 31. Chien WC, Chung CH, Lai CH, et al. A retrospective population-based study of  
11 injury types among elderly in Taiwan. *International journal of injury control*  
12 *and safety promotion* 2014;21(1):3-8. doi: 10.1080/17457300.2012.717084  
13 [published Online First: 2012/08/29]  
14  
15 32. National estimates of the ten leading causes of nonfatal injuries, Centers for  
16 Disease Control and Prevention. *CDC* 2004;[www.cdc.gov/injury/wisqars.html](http://www.cdc.gov/injury/wisqars.html)  
17 (Accessed on May 24, 2010).  
18  
19 33. Mackenzie EJ, Rivara FP, Jurkovich GJ, et al. The National Study on Costs and  
20 Outcomes of Trauma. *J Trauma* 2007;63(6 Suppl):S54-67; discussion S81-6.  
21 doi: 10.1097/TA.0b013e31815acb09  
22  
23 34. Global burden of disease. *World Health Organization* 2010;  
24 [www.who.int/healthinfo/global\\_burden\\_disease/en/](http://www.who.int/healthinfo/global_burden_disease/en/) (Accessed on May 01,  
25 2010).  
26  
27 35. Global Status on Road Safety. *World Health Organization*  
28 2015;[http://www.who.int/violence\\_injury\\_prevention/road\\_safety\\_status/20](http://www.who.int/violence_injury_prevention/road_safety_status/2015/)  
29 [15/](http://www.who.int/violence_injury_prevention/road_safety_status/2015/) (Accessed on April 04, 2016).  
30  
31 36. de Groot MH, van der Jagt-Willems HC, van Campen JP, et al. A flexed posture in  
32 elderly patients is associated with impairments in postural control during  
33 walking. *Gait Posture* 2014;39(2):767-72. doi: 10.1016/j.gaitpost.2013.10.015  
34  
35 37. Organization GWH. World Health Organization, Manual of the International  
36 Classification of Diseases, Injuries, and Causes of Death, Ninth Revision. 1977  
37  
38 38. Lin CL, Chung CH, Tsai YH, et al. Association between sleep disorders and injury: a  
39 nationwide population-based retrospective cohort study. *Injury prevention :*  
40 *journal of the International Society for Child and Adolescent Injury Prevention*  
41 2016;22(5):342-6. doi: 10.1136/injuryprev-2015-041844 [published Online  
42 First: 2016/02/20]  
43  
44 39. Jones RS, Kennedy JD, Hasham F, et al. Mechanical inefficiency of the thoracic  
45 cage in scoliosis. *Thorax* 1981;36(6):456-61.  
46  
47 40. Di Bari M, Chiarlone M, Matteuzzi D, et al. Thoracic kyphosis and ventilatory  
48 dysfunction in unselected older persons: an epidemiological study in  
49 Dicomano, Italy. *J Am Geriatr Soc* 2004;52(6):909-15. doi:  
50 10.1111/j.1532-5415.2004.52257.x  
51  
52 41. Bergofsky EH, Turino GM, Fishman AP. Cardiorespiratory failure in kyphoscoliosis.  
53  
54  
55  
56  
57  
58  
59  
60

- 1  
2  
3 *Medicine (Baltimore)* 1959;38:263-317.
- 4 42. Naeye RL. Kyphoscoliosis and cor pulmonale; a study of the pulmonary vascular  
5 bed. *Am J Pathol* 1961;38:561-73.
- 6  
7 43. Shannon DC, Riseborough EJ, Kazemi H. Ventilation perfusion relationships  
8 following correction of kyphoscoliosis. *JAMA* 1971;217(5):579-84.
- 9  
10 44. Shneerson JM. The cardiorespiratory response to exercise in thoracic scoliosis.  
11 *Thorax* 1978;33(4):457-63.
- 12  
13 45. Kesten S, Garfinkel SK, Wright T, et al. Impaired exercise capacity in adults with  
14 moderate scoliosis. *Chest* 1991;99(3):663-6.
- 15  
16 46. Lynn SG, Sinaki M, Westerlind KC. Balance characteristics of persons with  
17 osteoporosis. *Arch Phys Med Rehabil* 1997;78(3):273-7.
- 18  
19 47. de Groot MH, van der Jagt-Willems HC, van Campen JP, et al. Testing postural  
20 control among various osteoporotic patient groups: a literature review.  
21 *Geriatr Gerontol Int* 2012;12(4):573-85. doi:  
22 10.1111/j.1447-0594.2012.00856.x
- 23  
24 48. Katzman WB, Vittinghoff E, Kado DM, et al. Thoracic kyphosis and rate of incident  
25 vertebral fractures: the Fracture Intervention Trial. *Osteoporos Int*  
26 2016;27(3):899-903. doi: 10.1007/s00198-015-3478-2
- 27  
28 49. Brorsson B. Age and injury severity. *Scand J Soc Med* 1989;17(4):287-90.
- 29  
30 50. Wu SC, Leu SY, Li CY. Incidence of and predictors for chronic disability in activities  
31 of daily living among older people in Taiwan. *J Am Geriatr Soc*  
32 1999;47(9):1082-6.
- 33  
34 51. Covinsky KE, Palmer RM, Fortinsky RH, et al. Loss of independence in activities of  
35 daily living in older adults hospitalized with medical illnesses: increased  
36 vulnerability with age. *J Am Geriatr Soc* 2003;51(4):451-8.
- 37  
38 52. Gauchard GC, Lascombes P, Kuhnast M, et al. Influence of different types of  
39 progressive idiopathic scoliosis on static and dynamic postural control. *Spine*  
40 (*Phila Pa 1976*) 2001;26(9):1052-8.
- 41  
42 53. Silferi V, Rougier P, Labelle H, et al. [Postural control in idiopathic scoliosis:  
43 comparison between healthy and scoliotic subjects]. *Rev Chir Orthop*  
44 *Reparatrice Appar Mot* 2004;90(3):215-25.
- 45  
46 54. Skaggs DL, Bassett GS. Adolescent idiopathic scoliosis: an update. *Am Fam*  
47 *Physician* 1996;53(7):2327-35.
- 48  
49 55. Weinstein SL, Dolan LA, Wright JG, et al. Effects of bracing in adolescents with  
50 idiopathic scoliosis. *N Engl J Med* 2013;369(16):1512-21. doi:  
51 10.1056/NEJMoa1307337
- 52  
53 56. Negrini S, Minozzi S, Bettany-Saltikov J, et al. Braces for idiopathic scoliosis in  
54 adolescents. *Cochrane Database Syst Rev* 2015(6):CD006850. doi:

10.1002/14651858.CD006850.pub3

57. Fuschillo S, De Felice A, Martucci M, et al. Pulmonary rehabilitation improves exercise capacity in subjects with kyphoscoliosis and severe respiratory impairment. *Respir Care* 2015;60(1):96-101. doi: 10.4187/respcare.03095
58. Obayashi H, Urabe Y, Yamanaka Y, et al. Effects of respiratory-muscle exercise on spinal curvature. *J Sport Rehabil* 2012;21(1):63-8.
59. Menon B, Aggarwal B. Influence of spinal deformity on pulmonary function, arterial blood gas values, and exercise capacity in thoracic kyphoscoliosis. *Neurosciences (Riyadh)* 2007;12(4):293-8.

## Figure Legends

**Figure 1.** The flowchart of study sample selection from Taiwan National Health

Insurance Research Database

**Figure 2.** Kaplan-Meier curve for cumulative risk of injury among aged 20 over stratified by spinal curvature disorders with log-rank test

**Table 1. Demographic data for patients with and without spinal curvature disorders**

|               | Spinal curvature disorders |       |         |       | <i>p</i> value |
|---------------|----------------------------|-------|---------|-------|----------------|
|               | with                       |       | without |       |                |
| Variables     | n                          | %     | n       | %     |                |
| <b>Total</b>  | 20,566                     | 33.33 | 41,132  | 66.67 |                |
| <b>Gender</b> |                            |       |         |       | 0.999          |

|                                 |        |       |        |       |        |
|---------------------------------|--------|-------|--------|-------|--------|
| Male                            | 7,279  | 35.39 | 14,558 | 35.39 |        |
| Female                          | 13,287 | 64.61 | 26,574 | 64.61 |        |
| <b>Age group (years)</b>        |        |       |        |       | 0.999  |
| 20-40                           | 3,107  | 15.11 | 6,529  | 15.87 |        |
| 41-64                           | 6,597  | 32.08 | 13,386 | 32.54 |        |
| ≥ 65                            | 10,862 | 52.82 | 21,217 | 51.58 |        |
| <b>Number of comorbidities</b>  |        |       |        |       | <0.001 |
| 0                               | 12,469 | 60.63 | 19,513 | 47.44 |        |
| 1                               | 6,074  | 29.53 | 12,021 | 29.23 |        |
| ≥ 2                             | 2,023  | 9.84  | 9,598  | 23.33 |        |
| <b>Urbanization level</b>       |        |       |        |       | <0.001 |
| 1 (The highest)                 | 8,147  | 39.61 | 14,344 | 34.87 |        |
| 2                               | 7,807  | 37.96 | 17,780 | 43.23 |        |
| 3                               | 2,021  | 9.83  | 2,946  | 7.16  |        |
| 4 (The lowest)                  | 2,591  | 12.60 | 6,062  | 14.74 |        |
| <b>Insurance premium (NT\$)</b> |        |       |        |       | <0.001 |
| <18,000                         | 20,193 | 98.19 | 40,541 | 98.56 |        |
| 18,000-34,999                   | 324    | 1.58  | 482    | 1.17  |        |
| ≥ 35,000                        | 49     | 0.24  | 109    | 0.27  |        |

**Table 2. Risk of injury stratified by variables**

| Variables                | With spinal curvature disorders |           |                               | Without spinal curvature disorders |           |                               | Ratio | Adjusted HR†(95%CI)   |
|--------------------------|---------------------------------|-----------|-------------------------------|------------------------------------|-----------|-------------------------------|-------|-----------------------|
|                          | Event                           | PYs       | IR‡ (per 10 <sup>5</sup> PYs) | Event                              | PYs       | IR‡ (per 10 <sup>5</sup> PYs) |       |                       |
| <b>Total</b>             | 3,617                           | 33,167.52 | 10,905.25                     | 6,254                              | 69,032.77 | 9,059.47                      | 1.204 | 2.209 (2.118-2.303) * |
| <b>Gender</b>            |                                 |           |                               |                                    |           |                               |       |                       |
| Male                     | 1,308                           | 12,003.99 | 10,896.38                     | 2,288                              | 24,100.91 | 9,493.42                      | 1.148 | 2.098 (1.958-2.249) * |
| Female                   | 2,309                           | 21,163.52 | 10,910.28                     | 3,966                              | 44,931.86 | 8,826.70                      | 1.236 | 2.279 (2.162-2.402) * |
| <b>Age group (years)</b> |                                 |           |                               |                                    |           |                               |       |                       |

|                                 |       |           |           |       |           |           |       |                        |
|---------------------------------|-------|-----------|-----------|-------|-----------|-----------|-------|------------------------|
| 20-40                           | 289   | 2,945.11  | 9,812.88  | 177   | 6,082.11  | 2,910.17  | 3.372 | 6.665 (5.512-8.060) *  |
| 41-64                           | 885   | 7,561.59  | 11,703.89 | 603   | 8,360.88  | 7,212.16  | 1.623 | 6.154 (5.527-6.852) *  |
| ≥65                             | 2,443 | 22,660.82 | 10,780.72 | 5,474 | 54,589.78 | 10,027.52 | 1.075 | 1.666 (1.587-1.749) *  |
| <b>Number of comorbidities</b>  |       |           |           |       |           |           |       |                        |
| 0                               | 2,008 | 14,400.78 | 13,943.69 | 2,653 | 22,738.69 | 11,667.34 | 1.195 | 2.424 (2.284-2.572) *  |
| 1                               | 1,142 | 11,337.55 | 10,072.72 | 2,077 | 21,977.53 | 9,450.56  | 1.066 | 2.203 (2.047-2.371) *  |
| ≥2                              | 467   | 7,429.19  | 6,286.02  | 1,524 | 24,316.54 | 6,267.34  | 1.003 | 1.674 (1.507-1.860) *  |
| <b>Urbanization level</b>       |       |           |           |       |           |           |       |                        |
| 1 (The highest)                 | 1,012 | 9,790.98  | 10,336.04 | 1,759 | 20,803.62 | 8,455.26  | 1.222 | 2.225 (2.056-2.409) *  |
| 2                               | 1,522 | 14,516.01 | 10,484.97 | 2,813 | 31,263.20 | 8,997.80  | 1.165 | 2.145 (2.012-2.285) *  |
| 3                               | 325   | 2,422.89  | 13,413.73 | 463   | 4,925.73  | 9,399.62  | 1.427 | 2.766 (2.390-3.202) *  |
| 4 (The lowest)                  | 758   | 6,437.64  | 11,774.50 | 1,219 | 12,040.22 | 10,124.40 | 1.163 | 2.131 (1.942-2.339) *  |
| <b>Insurance premium (NT\$)</b> |       |           |           |       |           |           |       |                        |
| <18,000                         | 3,545 | 32,458.79 | 10,921.54 | 6,161 | 67,962.43 | 9,065.30  | 1.205 | 2.210 (2.118-2.305) *  |
| 18,000-34,999                   | 68    | 643.84    | 10,561.63 | 88    | 965.58    | 9,113.69  | 1.159 | 2.297 (1.651-3.194) *  |
| ≥35,000                         | 4     | 64.89     | 6,164.28  | 5     | 104.76    | 4,772.81  | 1.292 | 1.868 (0.430-8.119) ** |

\*p<0.001; \*\*p=0.405

†Adjusted HR: multivariable analysis including gender, age, number of comorbidities, urbanization level, and insurance premium.

‡Indicates incidence rate per 100,000 person-years.

IR, incidence rate; PYs = Person-years; Adjusted HR = Adjusted Hazard ratio; CI = confidence interval

**Table 3. Risk of injury stratified by subgroup of spinal curvature disorders**

| Spinal curvature disorders   | Crude HR (95% CI) | Adjusted HR † (95%CI)    |
|------------------------------|-------------------|--------------------------|
| Kyphosis                     |                   |                          |
| With                         | 1.579             | 2.777 (2.553 - 3.021) *  |
| Without                      | 1 (Reference)     | 1 (Reference)            |
| Lordosis                     |                   |                          |
| With                         | 1.033             | 2.087 (1.235 - 3.527) ** |
| Without                      | 1 (Reference)     | 1 (Reference)            |
| Kyphoscoliosis and scoliosis |                   |                          |



|             |               |                        |
|-------------|---------------|------------------------|
| With        | 1.146         | 2.113(2.201 - 2.210) * |
| Without     | 1 (Reference) | 1 (Reference)          |
| Unspecified |               |                        |
| With        | 1.388         | 2.727(2.119 - 3.509) * |
| Without     | 1 (Reference) | 1 (Reference)          |

ICD-9-CM code: kyphosis (ICD-9-CM 737.0, 737.1, 737.41), lordosis (ICD-9-CM 737.2, 737.42), kyphoscoliosis and scoliosis (ICD-9-CM 737.3, 737.43), and unspecified (ICD-9-CM 737.40, 737.8, 737.9)

ICD-9-CM, International Classification of Diseases, Ninth Revision, Clinical Modification

\* $p < 0.001$

\*\* $p = 0.006$

†Adjusted HR: multivariable analysis including gender, age, comorbidities, urbanization level, and insurance premium.

Adjusted HR = Adjusted Hazard ratio; CI = confidence interval

**Table 4. Risk of injury stratified by injury diagnosis, cause of injury, and intentionality of injury in the end of follow-up**

|                              | Crude HR (95%CI) | Adjusted HR † (95%CI) |
|------------------------------|------------------|-----------------------|
| <b>Injury diagnosis</b>      |                  |                       |
| Fracture                     | 1.193            | 1.502 (1.398-1.614) * |
| Dislocation                  | 1.859            | 1.732 (1.172-2.558) * |
| Sprains and strains          | 1.510            | 1.341 (0.927-1.942)   |
| Intracranial/internal injury | 0.835            | 0.996 (0.808-1.501)   |
| Open wound                   | 1.244            | 1.597 (1.310-1.939) * |

|                                       |       |                        |
|---------------------------------------|-------|------------------------|
| Injury to blood vessels               | 0.297 | 0.287 (0.007-11.122)   |
| Superficial injury/contusion          | 1.321 | 1.414 (1.131-1.761) *  |
| Crushing                              | 4.460 | 4.949 (1.093-30.895) * |
| Foreign body entering through orifice | 1.469 | 1.921 (0.970-3.803)    |
| Burn                                  | 2.018 | 1.453 (0.968-2.180)    |
| Injury to nerves and spinal cord      | 2.379 | 2.428 (1.310-4.500) *  |
| Poisoning                             | 0.999 | 0.983 (0.809-1.602)    |
| Others injury                         | 1.270 | 1.387 (1.284-1.499) *  |
| <b>Cause of injury</b>                |       |                        |
| Traffic injuries                      | 1.370 | 1.379 (1.191-1.597) *  |
| Poisoning                             | 1.150 | 1.423 (0.906-2.234)    |
| Falls                                 | 1.258 | 1.552 (1.429-1.686) *  |
| Burns and fires                       | 2.498 | 1.567 (0.977-2.567)    |
| Drowning                              | N/A   | N/A                    |
| Suffocation                           | 1.972 | 6.442 (2.335-17.776) * |
| Crushing/cutting/piercing             | 1.788 | 2.595 (1.056-3.409) *  |
| Other injuries                        | 1.401 | 1.612 (1.443-1.800) *  |
| <b>Intentionality of injury</b>       |       |                        |

|              |       |                       |
|--------------|-------|-----------------------|
| Unitentional | 1.335 | 1.537 (1.200-2.605) * |
| Intentional  | 2.330 | 2.218 (0.994-3.424)   |
| Unknown      | 1.095 | 1.076 (0.419-1.830)   |

\*p<0.05

Some patients did not provide information about cause and intentionality of injury

†Adjusted HR: multivariable analysis including gender, age, comorbidities, urbanization level, and insurance premium.

Adjusted HR = Adjusted Hazard ratio; CI = confidence interval

N/A: non-applicable due to only one drowning event in spine curvature disorders

patients and no drowning event in the control group.

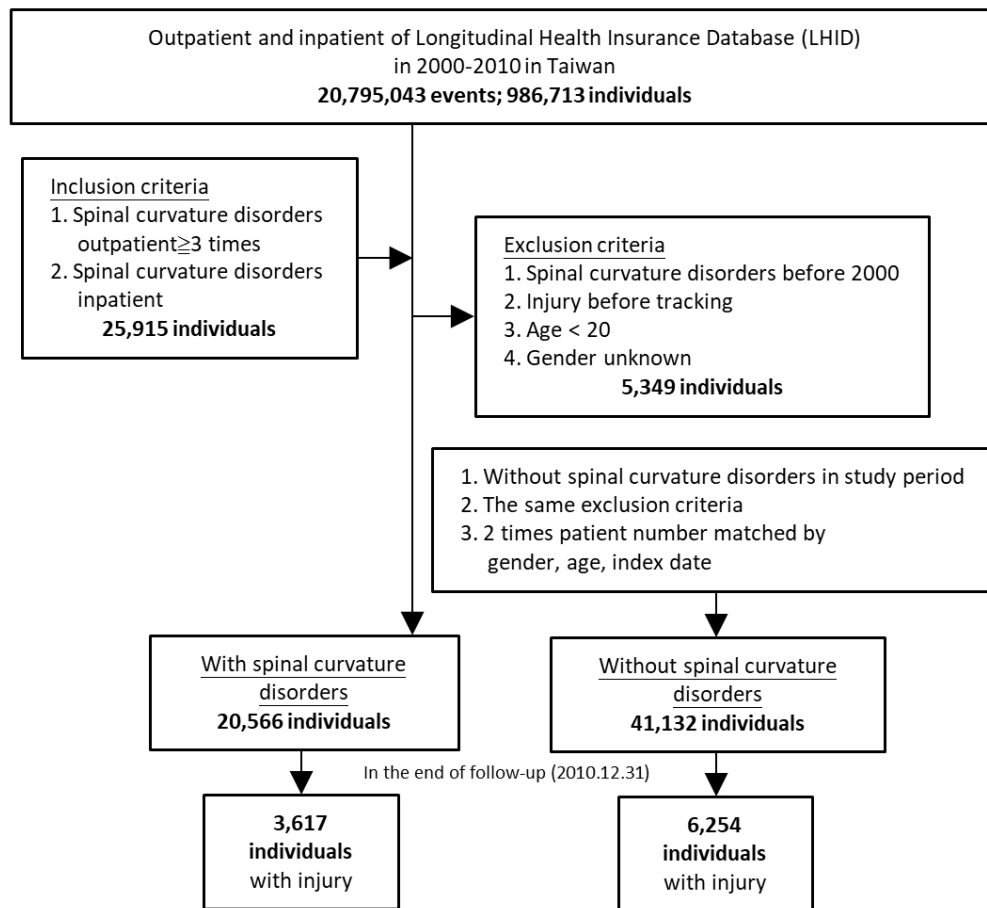

Figure 1. The flowchart of study sample selection from Taiwan National Health Insurance Research Database

90x90mm (300 x 300 DPI)

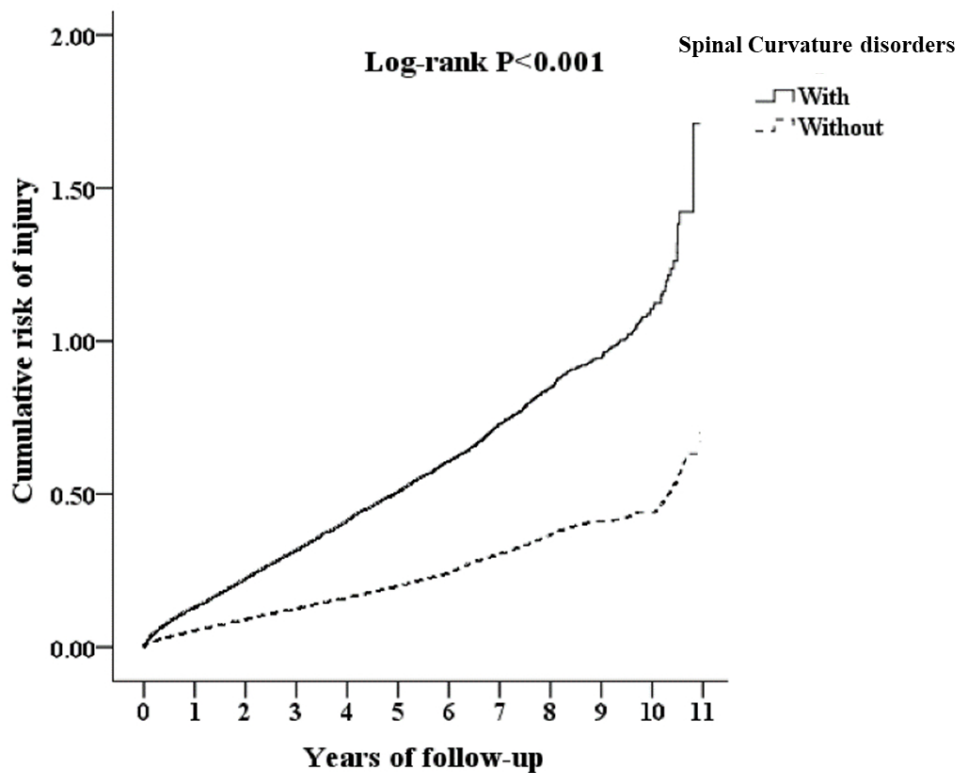

Figure 2. Kaplan-Meier curve for cumulative risk of injury among aged 20 over stratified by spinal curvature disorders with log-rank test

90x90mm (300 x 300 DPI)

STROBE Statement—Checklist of items that should be included in reports of *cohort studies*

|                              | Item No | Recommendation                                                                                                                                                                                                                                                                                                                                                                                                               |
|------------------------------|---------|------------------------------------------------------------------------------------------------------------------------------------------------------------------------------------------------------------------------------------------------------------------------------------------------------------------------------------------------------------------------------------------------------------------------------|
| <b>Title and abstract</b>    | 1       | (a) Indicate the study's design with a commonly used term in the title or the abstract <a href="#">P.1 Title and P.3 Abstract</a><br>(b) Provide in the abstract an informative and balanced summary of what was done and what was found <a href="#">P.3-P.4 Abstract</a>                                                                                                                                                    |
| <b>Introduction</b>          |         |                                                                                                                                                                                                                                                                                                                                                                                                                              |
| Background/rationale         | 2       | Explain the scientific background and rationale for the investigation being reported <a href="#">P.7</a>                                                                                                                                                                                                                                                                                                                     |
| Objectives                   | 3       | State specific objectives, including any prespecified hypotheses <a href="#">P.8</a>                                                                                                                                                                                                                                                                                                                                         |
| <b>Methods</b>               |         |                                                                                                                                                                                                                                                                                                                                                                                                                              |
| Study design                 | 4       | Present key elements of study design early in the paper <a href="#">P.9</a>                                                                                                                                                                                                                                                                                                                                                  |
| Setting                      | 5       | Describe the setting, locations, and relevant dates, including periods of recruitment, exposure, follow-up, and data collection <a href="#">P.10</a>                                                                                                                                                                                                                                                                         |
| Participants                 | 6       | (a) Give the eligibility criteria, and the sources and methods of selection of participants. Describe methods of follow-up <a href="#">P.9 and P.10</a><br>(b) For matched studies, give matching criteria and number of exposed and unexposed <a href="#">P.9 and P.10</a>                                                                                                                                                  |
| Variables                    | 7       | Clearly define all outcomes, exposures, predictors, potential confounders, and effect modifiers. Give diagnostic criteria, if applicable <a href="#">P.10 and P.11</a>                                                                                                                                                                                                                                                       |
| Data sources/<br>measurement | 8*      | For each variable of interest, give sources of data and details of methods of assessment (measurement). Describe comparability of assessment methods if there is more than one group <a href="#">P.9 and P.10</a>                                                                                                                                                                                                            |
| Bias                         | 9       | Describe any efforts to address potential sources of bias <a href="#">P.17 and P.18</a>                                                                                                                                                                                                                                                                                                                                      |
| Study size                   | 10      | Explain how the study size was arrived at <a href="#">P.9</a>                                                                                                                                                                                                                                                                                                                                                                |
| Quantitative variables       | 11      | Explain how quantitative variables were handled in the analyses. If applicable, describe which groupings were chosen and why <a href="#">N/A</a>                                                                                                                                                                                                                                                                             |
| Statistical methods          | 12      | (a) Describe all statistical methods, including those used to control for confounding <a href="#">P.11</a><br>(b) Describe any methods used to examine subgroups and interactions <a href="#">P.11</a><br>(c) Explain how missing data were addressed <a href="#">N/A</a><br>(d) If applicable, explain how loss to follow-up was addressed <a href="#">N/A</a><br>(e) Describe any sensitivity analyses <a href="#">N/A</a> |
| <b>Results</b>               |         |                                                                                                                                                                                                                                                                                                                                                                                                                              |
| Participants                 | 13*     | (a) Report numbers of individuals at each stage of study—eg numbers potentially eligible, examined for eligibility, confirmed eligible, included in the study, completing follow-up, and analysed <a href="#">P.9 and P.10</a><br>(b) Give reasons for non-participation at each stage <a href="#">P.9 and P.10</a><br>(c) Consider use of a flow diagram <a href="#">P.9 and P.10 and Figure 1</a>                          |
| Descriptive data             | 14*     | (a) Give characteristics of study participants (eg demographic, clinical, social) and information on exposures and potential confounders <a href="#">P.11 and P.12 and Table 1</a><br>(b) Indicate number of participants with missing data for each variable of interest <a href="#">N/A</a><br>(c) Summarise follow-up time (eg, average and total amount) <a href="#">P.12</a>                                            |
| Outcome data                 | 15*     | Report numbers of outcome events or summary measures over time <a href="#">P.12-P.14</a>                                                                                                                                                                                                                                                                                                                                     |
| Main results                 | 16      | (a) Give unadjusted estimates and, if applicable, confounder-adjusted estimates and their precision (eg, 95% confidence interval). Make clear which confounders were                                                                                                                                                                                                                                                         |

|           |          |
|-----------|----------|
| Formatted | ... [1]  |
| Formatted | ... [2]  |
| Formatted | ... [3]  |
| Formatted | ... [4]  |
| Formatted | ... [5]  |
| Formatted | ... [6]  |
| Formatted | ... [7]  |
| Formatted | ... [8]  |
| Formatted | ... [9]  |
| Formatted | ... [10] |
| Formatted | ... [11] |
| Formatted | ... [12] |
| Formatted | ... [13] |
| Formatted | ... [14] |
| Formatted | ... [15] |
| Formatted | ... [16] |
| Formatted | ... [17] |
| Formatted | ... [18] |
| Formatted | ... [19] |
| Formatted | ... [20] |
| Formatted | ... [21] |
| Formatted | ... [22] |
| Formatted | ... [23] |
| Formatted | ... [24] |
| Formatted | ... [25] |
| Formatted | ... [26] |
| Formatted | ... [27] |
| Formatted | ... [28] |
| Formatted | ... [29] |
| Formatted | ... [30] |
| Formatted | ... [31] |
| Formatted | ... [32] |
| Formatted | ... [33] |
| Formatted | ... [34] |
| Formatted | ... [35] |
| Formatted | ... [36] |
| Formatted | ... [37] |
| Formatted | ... [38] |
| Formatted | ... [39] |
| Formatted | ... [40] |
| Formatted | ... [41] |
| Formatted | ... [42] |
| Formatted | ... [43] |
| Formatted | ... [44] |
| Formatted | ... [45] |
| Formatted | ... [46] |
| Formatted | ... [47] |
| Formatted | ... [48] |
| Formatted | ... [49] |
| Formatted | ... [50] |
| Formatted | ... [51] |

1  
2  
3  
4  
5  
6  
7  
8  
9  
10  
11  
12  
13  
14  
15  
16  
17  
18  
19  
20  
21  
22  
23  
24  
25  
26  
27  
28  
29  
30  
31  
32  
33  
34  
35  
36  
37  
38  
39  
40  
41  
42  
43  
44  
45  
46  
47  
48  
49  
50  
51  
52  
53  
54  
55  
56  
57  
58  
59  
60

|                          |    |                                                                                                                                                                                                          |
|--------------------------|----|----------------------------------------------------------------------------------------------------------------------------------------------------------------------------------------------------------|
|                          |    | adjusted for and why they were included <a href="#">P.12</a>                                                                                                                                             |
|                          |    | (b) Report category boundaries when continuous variables were categorized <a href="#">P.12</a>                                                                                                           |
|                          |    | (c) If relevant, consider translating estimates of relative risk into absolute risk for a meaningful time period <a href="#">N/A</a>                                                                     |
| Other analyses           | 17 | Report other analyses done—eg analyses of subgroups and interactions, and sensitivity analyses <a href="#">P.12 to P.14</a>                                                                              |
| <b>Discussion</b>        |    |                                                                                                                                                                                                          |
| Key results              | 18 | Summarise key results with reference to study objectives <a href="#">P.14</a>                                                                                                                            |
| Limitations              | 19 | Discuss limitations of the study, taking into account sources of potential bias or imprecision. Discuss both direction and magnitude of any potential bias <a href="#">P.17 and P.18</a>                 |
| Interpretation           | 20 | Give a cautious overall interpretation of results considering objectives, limitations, multiplicity of analyses, results from similar studies, and other relevant evidence <a href="#">P.17 and P.18</a> |
| Generalisability         | 21 | Discuss the generalisability (external validity) of the study results <a href="#">P.17</a>                                                                                                               |
| <b>Other information</b> |    |                                                                                                                                                                                                          |
| Funding                  | 22 | Give the source of funding and the role of the funders for the present study and, if applicable, for the original study on which the present article is based <a href="#">N/A P.6</a>                    |

- Formatted: Font color: Red
- Formatted: Font: (Asian) Chinese (Taiwan)
- Formatted: Font color: Red
- Formatted: Font: (Asian) Chinese (Taiwan)
- Formatted: Font color: Red
- Formatted: Font: (Asian) Chinese (Taiwan)
- Formatted: Font color: Red
- Formatted: Font: (Asian) Chinese (Taiwan)
- Formatted: Font color: Red
- Formatted: Font: (Asian) Chinese (Taiwan)
- Formatted: Font color: Red
- Formatted: Font: (Asian) Chinese (Taiwan)
- Formatted: Font color: Red
- Formatted: Font: (Asian) Chinese (Taiwan)
- Formatted: Font color: Red
- Formatted: Font: (Asian) Chinese (Taiwan)
- Formatted: Font color: Red
- Formatted: Font: (Asian) Chinese (Taiwan)
- Formatted: Font color: Red
- Formatted: Font: (Asian) Chinese (Taiwan)



- 1
- 2 **7/14/2018 2:51:00 PM**
- 3
- 4
- 5 **6/20/2018 10:51:00 AM**
- 6
- 7
- 8
- 9 **7/14/2018 2:51:00 PM**
- 10
- 11
- 12
- 13 **6/20/2018 10:51:00 AM**
- 14
- 15
- 16 **7/14/2018 2:52:00 PM**
- 17
- 18
- 19
- 20 **6/20/2018 10:51:00 AM**
- 21
- 22
- 23
- 24
- 25
- 26
- 27
- 28
- 29
- 30
- 31
- 32
- 33
- 34
- 35
- 36
- 37
- 38
- 39
- 40
- 41
- 42
- 43
- 44
- 45
- 46
- 47
- 48
- 49
- 50
- 51
- 52
- 53
- 54
- 55
- 56
- 57
- 58
- 59
- 60

For peer review only

7/14/2018 2:52:00 PM  
1 **6/20/2018 10:54:00 AM**

2  
3  
4 **7/14/2018 2:52:00 PM**

5  
6  
7  
8 **6/20/2018 10:55:00 AM**

9  
10  
11  
12 **7/14/2018 2:52:00 PM**

13  
14  
15 **6/20/2018 10:55:00 AM**

16  
17  
18  
19 **7/14/2018 2:52:00 PM**

For peer review only

6/20/2018 10:57:00 AM

1  
2

7/14/2018 2:52:00 PM

4  
5

6/20/2018 10:58:00 AM

8  
9

6/20/2018 10:58:00 AM

11  
12  
13

7/14/2018 2:52:00 PM

15  
16  
17

6/20/2018 10:59:00 AM

19  
20  
21  
22  
23  
24  
25  
26  
27  
28  
29  
30  
31  
32  
33  
34  
35  
36  
37  
38  
39  
40  
41  
42  
43  
44  
45  
46  
47  
48  
49  
50  
51  
52  
53  
54  
55  
56  
57  
58  
59  
60

For peer review only

1  
2  
3  
4  
5  
6  
7  
8  
9  
10  
11  
12  
13  
14  
15  
16  
17  
18  
19  
20  
21  
22  
23  
24  
25  
26  
27  
28  
29  
30  
31  
32  
33  
34  
35  
36  
37  
38  
39  
40  
41  
42  
43  
44  
45  
46  
47  
48  
49  
50  
51  
52  
53  
54  
55  
56  
57  
58  
59  
60

For peer review only
